# Supplementary material
Source: PubMed Central journal article supplement (PMC4104672)
Supplement: NIHMS598420-supplement-Supplements.pdf [file NIHMS598420-supplement-Supplements.pdf]

# ACA12 Is a Deregulated Isoform of Plasma Membrane Ca<sup>2+</sup>-ATPase of *Arabidopsis thaliana*

## PLANT MOLECULAR BIOLOGY

Margherita Limonta, Shawn Romanowsky, Claudio Olivari, Maria Cristina Bonza, Laura Luoni, Alexa Rosenberg, Jeffrey F. Harper and Maria Ida De Michelis

**Corresponding author:** Maria Ida De Michelis, Dipartimento di Bioscienze, Università degli Studi di Milano (Italy), mariaida.demichelis@unimi.it

### Online Resource 1

#### DNA sequences of plasmid constructs

**Plasmid Stock 391, 35s::ACA12-GFP.** The ACA12 coding sequence (blue italics) begins downstream of a unique *AscI* site, with the sequence *ATGAGGGACCTC* and ends with *CTCAAGAAACCT*. Immediately downstream is a GFP coding sequence (green italics) starting with the sequence ATGGTGAGCAAG and ending with the sequence *CATCACCATCACCATCACGGATCC* TGA encoding a 6xHis tag followed by a stop codon in red highlight. This plant expression vector is based on a pBIN101.2 vector and harbors a kanamycin resistance marker for selection in bacteria and plants.

```
TGAGCGTCGCAAAGGCGCTCGGTCTTGCCCTTGCTCGTTCGGTGATGTACTTCACCAGCTCCGCGAAGTCGCTCTTC
TTGATGGAGCGCATGGGGACGTGCTTGGCAATCACGCGCACCCCCGGCCGTTTTAGCGGCTAAAAAAGTCATGG
CTCTGCCCTCGGGCGGACCACGCCATCATGACCTTGCCAAGCTCGTCCTGCTTCTCTTCGATCTTCGCCAGCAG
GGCGAGGATCGTGGCATCACCGAACCGCGCCGTGCGCGGGTTCGTCGGTGAGCCAGAGTTTCAGCAGGCCGCCAG
GCGGCCAGGTCGCCATTGATGCGGGCCAGCTCGCGGACGTGCTCATAGTCCACGACGCCCGTGATTTTGTAGCC
CTGGCCGACGGCCAGCAGGTAGGCCGACAGGCTCATGCCGGCCGCCGCCGCTTTTTCCTCAATCGCTCTTCGTTT
GTCTGGAAGGCAGTACACCTTGATAGGTGGGCTGCCCTTCTGGTTGGCTTGGTTTCATCAGCCATCCGCTTGCC
CTCATCTGTTACGCCGGCGGTAGCCGGCCAGCCTCGCAGAGCAGGATTCCTGTTGAGCACCGCCAGGTGCGAATA
AGGGACAGTGAAGAAGGAACACCCGCTCGCGGGTGGGCTACTTCACCTATCCTGCCCGGCTGACGCCGTTGGAT
ACACCAAGGAAAGTCTACACGAACCCTTTGGCAAATCCTGTATATCGTGCGAAAAGGATGGATATACCGAAAA
AATCGCTATAATGACCCGAAGCAGGGTTATGCAGCGGAAAAGCGCCACGCTTCCCGAAGGAGAAAGGCGGACA
GGTATCCGGTAAGCGGCAGGGTTCGGAACAGGAGAGCGCACAGGGAGCTTCCAGGGGGAAACGCCTGGTATCTTT
ATAGTCTGTGCGGGTTTCGCCACCTCTGACTTGAGCGTCGATTTTTGTGATGCTCGTCAGGGGGCGGAGCCTAT
GGAAAACGCCAGCAACGCGGCCTTTTTACGGTTCTTGCCCTTTTGTGCTGGCCTTTTGTGCTCACATGTTCTTCTG
CGTTATCCCTGATTCTGTGGATAACCGTATTACCGCCTTTGAGTGAGCTGATAACCGCTCGCCGAGCCGAACGA
CCGAGCGCAGCGAGTCAGTGAGCGAGGAAGCGGAAGAGCGCCAGAAGGCCCGCCAGAGAGGCCGAGCGCGGCCGTG
AGGCTTGGACGCTAGGGCAGGGCATGAAAAAGCCCGTAGCGGGCTGCTACGGGGCTCTGACGCGGTGGAAAGGGG
GAGGGGATGTTGTCTACATGGCTCTGCTGTAGTGAGTGGGTTGCGCTCCGGCAGCGGTCTGATCAATCGTCACC
CTTTCTCGGTCTTCAACGTTCTGACAACGAGCCTCCTTTTCGCCAATCCATCGACAATCACCGCGAGTCCCTG
CTCGAACGCTGCGTCCGGACCGGCTTCGTCGAAGGCGTCTATCGCGGCCCGCAACAGCGGCAGAGCGGAGCCTG
TTCAACGGTGCCGCCGCGCTCGCCGGCATCGCTGTCGCCGGCCTGCTCCTCAAGCACGGCCCCAACAGTGAAGTA
GCTGATTGTCATCAGCGCATTGACGGCGTCCCGGCCGAAAAACCCGCTCGCAGAGGAAGCGAAGCTGCGCGTC
GGCCGTTTCCATCTGCGGTGCGCCGGTTCGCGTCCCGGCATGGATGCGCGCGCCATCGCGGTAGGCGAGCAGCGC
CTGCCTGAAGCTGCGGGCATTTCCGATCAGAAATGAGCGCCAGTCGTCGTCGGCTCTCGGCACCGAATGCGTATG
ATTCTCCGCCAGCATGGCTTCGGCCAGTTCGCTCGAGCAGCGCCCGCTTGTTCCTGAAGTGCAGTAAAGCGCCGG
CTGCTGAACCCCAACCGTTCCGCCAGTTTGGCTGTCGTCAGACCGTCTACGCCGACCTCGTTCAACAGGTCAG
GGCGGCACGGATCACTGTATTGGCTGCAACTTTGTTCATGCTTGACACTTTATCACTGATAAACATAATATGTCC
ACCAACTTATCAGTGATAAAGAATCCGCGCGTTCAATCGGACCAGCGGAGGCTGGTCCGGAGGCCAGACGTGAAA
CCCAACATAACCCTGATCGTAATTCTGAGCACTGTCGCGCTCGACGCTGTCGGCATCGGCCGTTGATTATGCCGGTG
CTGCCGGGCCCTCCTGCGCGATCTGGTTCACTCGAACGACGTCACCGCCACTATGGCATTCTGCTGGCGCTGTAT
GCGTTGGTGCAATTTGCCTGCGCACCTGTGCTGGGCGCGCTGTCGGATCGTTTCGGGCGGCGGCCAATCTTGCTC
```

GTCTCGCTGGCCGGCGCCAGATCTGGGGAACCCTGTGGTTGGCATGCACATACAAATGGACGAACGGATAAACCT  
TTTCACGCCCTTTTAAATATCCGATTATTCTAATAAACGCTCTTTTCTCTTAGGTTTACCCGCCAATATATCCTG  
TCAAACACTGATAGTTTAAACTGAAGGCGGGAACGACAATCTGATCATGAGCGGAGAATTAAGGGAGTCACGTT  
ATGACCCCCCGCGATGACGCGGGACAAGCCGTTTTACGTTTGGAACTGACAGAACCGCAACGTTGAAGGAGCCAC  
TCAGCCGCGGGTTTTCTGGAGTTTAAATGAGCTAAGCACATACGTCAGAAACCATTATTGCGCGTTCAAAAAGTCGCC  
TAAGGTCACTATCAGCTAGCAAATATTTCTTGTCAAAAATGCTCCACTGACGTTCCATAAAATCCCCTCGGTATC  
CAATTAGAGTCTCATATTCACCTCTCAATCCAAATAATCTGCACCGGATCTGGATCGTTTTCGCATGATTGAACAAG  
ATGGATTGCACGCAGGTTCTCCGGCCGCTTGGGTGGAGAGGCTATTCCGGCTATGACTGGGCACAACAGACAATCG  
GCTGCTCTGATGCCGCCGTGTTCCGGCTGTCAGCGCAGGGGCGCCCGGTTCTTTTTGTCAAGACCGACCTGTCCG  
GTGCCCTGAATGAAGTGCAGGACGAGGCAGCGCGGCTATCGTGGCTGGCCACGACGGGCGTTCCTTGCGCAGCTG  
TGCTCGACGTTGTCACTGAAGCGGGAAGGGACTGGCTGCTATTGGGCGAAGTGCCGGGGCAGGATCTCCTGTCAT  
CTCACCTTGCTCCTGCCGAGAAAGTATCCATCATGGCTGATGCAATGCGGCGGCTGCATACGTTGATCCGGCTA  
CCTGCCCATTCGACCACCAAGCGAAACATCGCATCGAGCGAGCACGTAATCGGATGGAAGCCGGTCTTGTCGATC  
AGGATGATCTGGACGAAGAGCATCAGGGGCTCGCGCCAGCCGAACGTTCCGCCAGGCTCAAGGCGCGCATGCCCG  
ACGGCGATGATCTCGTCGTGACCCATGGCGATGCCTGCTTGCCGAATATCATGGTGGAAAAATGGCCGCTTTTCTG  
GATTCATCGACTGTGGCCGGCTGGGTGTGGCGGACCGCTATCAGGACATAGCGTTGGCTACCCGTGATATTGCTG  
AAGAGCTTGGCGGCGAATGGGCTGACCGCTTCTCGTGTCTTACGGTATCGCCGCTCCCGATTTCGACGCGCATCG  
CCTTCTATCGCCTTCTTGACGAGTTCTTCTGAGCGGGACTCTGGGGTTCGAAATGACCGACCAAGCGACGCCCAA  
CCTGCCATCAGGATTTTCGATTCCACCGCCGCTTCTATGAAAGGTTGGGCTTCGGAATCGTTTTCCGGGACGC  
CGGCTGGATGATCCTCCAGCGCGGGGATCTCATGCTGGAGTTCTTCCGCCACGGGATCTCTGCGGAACAGGCGGT  
CGAAGGTGCCGATATCATTACGACAGCAACGGCCGACAAGCACAACGCCACGATCCTGAGCGACAATATGATCGG  
GCCGGCGTCCACATCAACGGCGTCGCGCGGACTGCCAGGCAAGACCGAGATGCACCGCGATATCTTGCTGCG  
TTCGGATATTTTCGTGGAGTTCCCGCCACAGACCCGGATGATCCCCGATCGTTCAAACATTTGGCAATAAAGTTT  
CTTAAGATTGAATCCTGTTGCCGGTCTTGCGATGATTATCATATAATTTCTGTTGAATTACGTTAAGCATGTAAT  
AATTAACATGTAATGCATGACGTTATTTATGAGATGGGTTTTTATGATTAGAGTCCCAGCAATTATACATTTAATA  
CGCGATAGAAAACAAAATATAGCGCGCAAACTAGGATAAAATATCGCGCGCGGTGTCATCTATGTTACTAGATCG  
GGCCTCCTGTCAATGCTGGCGGCGGCTCTGGTGGTGGTTCTGGTGGCGGCTCTGAGGGTGGTGGCTCTGAGGGTG  
GCGGTTCTGAGGGTGGCGGCTCTGAGGGAGGCGGTTCCGGTGGTGGCTCTGGTTCCGGTGATTTTGGATTATGAAA  
AGATGGCAAACGCTAATAAAGGGGCTATGACCGAAAATGCCGATGAAAACGCGCTACAGTCTGACGCTAAAGGCA  
AATTTGATTCTGTGCTACTGATTACGGTGCTGCTATCGATGGTTTTCATTTGGTGACGTTTCCGGCCTTGCTAATG  
GTAATGGTGCTACTGGTGATTTTGGTGGCTCTAATTTCCCAAATGGCTCAAGTCCGGTGACGGTGATAATTCACCTT  
TAATGAATAAATTTCCGTCAATATTTACCTTCCCTCCCTCAATCGGTTGAATGTCGCCCTTTTGTCTTTGGCCCAA  
TACGCAAACCGCCTCTCCCCGCGGTTGGCCGATTCATTAATGCAGCTGGCACGACAGGTTTCCCGACTGGAAG  
CGGGCAGTGAGCGCAACGCAATTAATGTGAGTTAGCTCACTCATTAGGCACCCAGGCTTTACACTTTATGCTTC  
CGGCTCGTATGTTGTGTGGAATTTGTGAGCGGATAACAATTTACACAGGAAACAGCTATGACCATGATTACGCCA  
AGCTTGATGCTTGCAGGTCAACATGGTGGAGCACGACACACTTGTCTACTCCAAAATATCAAAGATACAGTCT  
CAGAAGACCAAAGGGCAATTGAGACTTTTCAACAAAGGGTAATATCCGGAACCTCCTCGGATTCATTGCCAG  
CTATCTGTCACTTTTATTGTGAAGATAGTGGAAAAGGAAGGTGGCTCCTACAAATGCCATCATTGCGATAAAGGAA  
AGGCCATCGTTGAAGATGCCTCTGCCGACAGTGGTCCCAAAGATGGACCCCCACCCACGAGGAGCATCGTGAAA  
AAGAAGACGTTCCAACCACGTCTTCAAAGCAAGTGGATTGATGTGATAACATGGTGGAGCACGACACACTTGTCT  
ACTCCAAAAATATCAAAGATACAGTCTCAGAAGACCAAAAGGCAATTGAGACTTTTCAACAAAGGGTAATATCCG  
GAAACCTCCTCGGATTCCATTGCCAGCTATCTGTCACTTTATTGTGAAGATAGTGGAAAAGGAAGGTGGCTCCT  
ACAAATGCCATCATTGCGATAAAGGAAAGGCCATCGTTGAAGATGCCTCTGCCGACAGTGGTCCCAAAGATGGAC  
CCCCACCCACGAGGAGCATCGTGAAAAAAGAAGACGTTCCAACCACGCTCTCAAAGCAAGTGGATTGATGTGATA  
TCTCCACTGACGTAAGGGATGACGCACAATCCACTATCCTTCGCAAGACCTTCTCTATATTAGGAAGTTCAT  
TTCATTTGGAGAGGACCTCGACCTCAACACAACATATACAAAACAACGAATCTCAAGCAATCAAGCATCTACT  
TCTATTGCAGCAATTTAAATCATTTCTTTTAAAGCCAAAGCAATTTTCTGGAAATTTTACCATTACGAACGAT  
ACTCGAGGGCGCGCCCGGTATGAGGGACCTCAAGGAATATGATTACAGTGCACCTTTTGTCAACCTTACCACCTC  
CAGCCTCAACAAGGCCAGAGGCGTTGGCGTTTTGCCTACGCTGCCATCTACTCTATGAGGGCTATGCTCTCTCT  
TGTTAAGGAGATAGTTCCCGCAAGGATTGATCCCAAACCTCAGATGCCTCTCTCTCTCTCTCTACACAGCCCT  
CGAGTCCGGTGAGGGAGCAAAGATCAACTCTATGCCTCTCTTACGTTCCCTGCCATTGATCAAGAAACAATTGT  
GGAGATCATGAAGGGTAAGGACTTACCGGGCATCCAAGCGCTGGGCGGCGTGGAGGGTGTGCGCCGCTTCCCTTAG  
GACTAACCCACCAAAGGGATCCACGGGAATGAGCAAGAAGTCAGTAGACGCCGTGACCTCTTTGGCTCTAACAC  
CTACCATAAGCCACCGCCTAAAGGACTTCTCTTCTTTGTGTATGAAGCTTCAAAGACCTAACCATCTTGATCTT

GTTGGTCTGCGCTATTTTCTCCCTTGGCTTCGGTATCAAAGAACATGGCATCAAAGAAGGTTGGTATGAAGCGG  
AAGCATCTTTGTAGCAGTCTTCTTGGTCATAGTTGTCTCTGCTCTCAGCAACTTTAGGCAGGAGAGACAGTTCGA  
CAAGCTGTCCAAGATAAGCAATAACATCAAAGTGGAAGTCTTTCGGGACAGCAGGCGGCAACATATCTCCATCTT  
TGACGTTGTTGTTGGTGATGTTGTCTTCTTGAAGATCGGAGATCAGATCCCCTGATGGTCTGTTCTTGGAAAG  
GCATTCACTTCAGGTGGACGAGTCTAGTATGACAGGAGAGAGTGACCATCTTGAAGTGGACCACAAGGATAATCC  
CTTCTTGTCTCAGGGACAAAGATAGTCGATGGGTTTTGCTCAAATGCTCGTTGTCTCTGTGGGTATGAGTACAAC  
CTGGGGACAGACGATGAGCTCCATAAATCAAGATTCCAGCGAGAGAACACCTTTGCAAGTCCGTCTTGACACGCT  
GACCTCCACCATCGGAAAAATGGTCTTACGGTGGCAGCACTTGTCTGGTAGTTCTATTAGTCCGTTACTTCAC  
TGGGAACACAGAGAAAGAGGGCAAAGAGAATACAACGGGAGCAAAACACCTGTGGACACTGTGGTCAATCCGT  
TGTGCGAATCGTGGCAGCTGCAGTAACCATTGTCTGATAGCTATCCCAGAAGGCTTGCCATTGGCTGTGACTCT  
GACGCTGGCTTACTCCATGAAGAGAATGATGTCTGATCAAGCTATGGTCAGAAAGCTCTCGGCATGCGAGACGAT  
GGGCTCAGCGACAGTGATATGCACAGACAAAACAGGTACTTTAACACTGAACGAGATGAAGGTTACCAAGTTTTG  
GCTTGGCCAAGAGTCAATCCATGAAGACTCTACCAAATGATCTCACCAGACGTTCTTGATCTGCTTTACCAAGG  
CACCGGTCTGAACACAACGGGAAGTGTCTGTGTGTGACTCAGGATCAACGCCTGAGTTCTCAGGCAGTCCAAC  
AGAGAAGGCCCTCTTGTCTTGGACTGTGCTAAATCTGGGTATGGATATGGAGTCAGTAAAGCAGAAACATGAAGT  
TCTCCGCGTTGAACTTTCAGTTCAGCAAAGAAAAGAAGCGGAGTTTTGGTCCGAAGAAAATCTGACAATACAGT  
CCATGTACACTGGAAAGGAGCCGCTGAAATGGTCTAGCTATGTGTTCTCACTACTACACAAGCACTGGGTCTGT  
TGACTTAATGGACTCCACCGCAAAGAGCAGAATTCAGGCAATAATCCAAGGTATGGCGGCCAGTAGCCTCAGATG  
CATAGCATTTCGCTCATAAAATAGCGTCAAATGACTCGGTATTAGAGGAAGATGGCTTGACCTTGATGGGAATAGT  
GGGTCTGAAAGATCCTTGTGACCTGGTGTCTCAAAGCTGTGGAACTTGCAAACCTGCAGGAGTCAACATTAA  
GATGATAACGGGAGATAATGTTTTCACTGCAAAGCTATCGCTTTTGAATGCGGAATCTCGACCACAATGACAA  
AGATGAAGAAGATGCTGTTGTAGAAGGTGTTCAATTCAGAAATTATACGGACGAAGAGAGAATGCAGAAAAGTTGA  
TAAGATCCGGGTATGGCAAGGTCCTCTCCCTCCGACAAGCTTCTAATGGTCAAGTGTCTGAGACTTAAAGGCCA  
TGTGGTAGCCGTCACAGGGGATGGCACCAACGATGCACCTGCACTAAAAAGAAGCAGATATTGGACTCTCTATGGG  
AATTCAGGGCACTGAAGTGGCAAAGAAAAGCTCAGACATTGTAATTCTAGATGATAACTTCGCATCCGTTGCCAC  
AGTCTTAAAAATGGGGAAGGTGTGTCTACAACAATATCCAGAAATTCATTCAGTTTCAGCTAACAGTGAACGTTGC  
AGCTCTTGTGATCAATTTTTATCGCAGCAATTTTCAGCCGGTGAGGTCCCTTTGACAGCAGTTCAACTGCTGTGGGT  
AAACCTCATCATGGACACATTTGGGAGCTCTGGCTCTCGCCACGGAGCGACCCACTAACGAGCTCCTGAAGAGAAA  
GCCAGTTGGCCGAACAGAGGCCCTGATAACAAATGTCATGTGGAGGAATCTCCTGGTTTCAGTCATTATATCAAAT  
AGCCGTACTCTTGATCTTACAATTCAGGGTATGTCAATATTCAGTGTTCGCAAGGAAGTGAAGGACACGCTCAT  
ATTCAACACTTTTCGTGCTCTGTCAAGTTTTTAACGAATTCATGCGAGGGAGATGGAGAAGAAAAATGTGTTCAA  
AGGCCTTCACAGAAACAGGTTGTTCAATTGGAATAATAGCGATAACTATTGTGCTTCAAGTCATTATGGTGGAATT  
CCTAAAGAAGTTTTCGGATACAGTAAGGCTTAAACGGGTGGCAATGGGGAACCTGCATAGCACTTGCATCCCTTTC  
ATGGCCGATCGGCTTTTTTACAAAATTCATACCTGTTTCTGAGACACCATTCTCAGTTACTTTAAGAATCCAAG  
ATCCTTATTTAAGGGTTAAGAAGCCCATCTCTCAAGAAACCTGGACTAGTGATGGTGAGCAAGGGCGAGGAGCT  
GTTACCGGGGTGGTGGCCATCCTGGTCGAGCTGGACGGCGACGTAAACGGCCACAAGTTCAGCGTGTCCGGCGA  
GGGCGAGGGCGATGCCACCTACGGCAAGCTGACCCTGAAGTTCATCTGCACCACCGGCAAGCTGCCCGTGCCCTG  
GCCACCCCTCGTGACCACCTTACCTACGGCGTGCAGTGCTTCAGCCGCTACCCCGACCACATGAAGCAGCACGA  
CTTCTTCAAGTCCGCCATGCCCGAAGGCTACGTCCAGGAGCGCACCATCTTCTTCAAGGACGACGGCAACTACAA  
GACCCGCGCCGAGGTGAAGTTCAGAGGGCGACACCCTGGTGAACCGCATCGAGCTGAAGGGCATCGACTTCAAGGA  
GGACGGCAACATCCTGGGGCACAAGCTGGAGTACAACACTACAACAGCCACAACGTCTATATCATGGCCGACAAGCA  
GAAGAACGGCATCAAGGTGAACCTCAAGATCCGCCACAACATCGAGGACGGCAGCGTGCAGCTCGCCGACCACTA  
CCAGCAGAACACCCCCATCGGGCAGCGCCCCGTGCTGCTGCCGACAACCACTACCTGAGCACCCAGTCCGCCCT  
GAGCAAAGACCCCAACGAGAAGCGCGATCACATGGTCTGCTGGAGTTCGTGACCGCCGGGATCACTCACGG  
CATGGACGAGCTGTACAAGGCTCTAGACCCGGGAATGCATCACCATCACCATCACGGATCCGATTGATCGATAG  
AGCTCGAATTTCCCGGATCGTTCAAACATTTGGCAATAAAGTTTCTTAAAGATTGAATCCTGTTGCCGGTCTTGGC  
ATGATTATCATATAATTTCTGTTGAATTACGTTAAGCATGTAATAATTAACATGTAATGCATGACGTTATTTATG  
AGATGGGTTTTTATGATTAGAGTCCCGAATTATACATTTAATACGCGATAGAAAACAAAATATAGCGCGCAAC  
TAGGATAAATATCGCGCGCGGTGTCTATGTTACTAGATCGGGAATTCACTGGCCGTCGTTTTTACAACGTCG  
TGACTGGGAAAACCCTGGCGTTACCCAACCTAATCGCCTTGCAGCACATCCCCCTTTCGCCAGCTGGCGTAATAG  
CGAAGAGGCCCGCACCGATCGCCCTTCCCAACAGTTGCGCAGCCTGAATGGCGCCCGCTCCTTTCGCTTCTTCC  
CTTCTTCTCGCCACGTTCCGCCGCTTTCGCCGTCAAGCTCTAAATCGGGGGCTCCCTTTAGGGTTCCGATTTA  
GTGCTTTACGGCACCTCGACCCCAAAAACTTGATTTGGGTGATGGTTCACGTAGTGGGCCATCGCCCTGATAGA  
CGTTTTTTCGCCCTTTGACGTTGGAGTCCACGTTCTTTAATAGTGGACTCTTGTTCCAAAC TGAACAACTCA

ACCCTATCTCGGGCTATTCTTTTGATTTATAAGGGATTTTGCCGATTTTCGGAACCACCATCAAACAGGATTTTCG  
CCTGCTGGGGCAAACCAGCGTGGACCCTTGCTGCAACTCTCTCAGGGCCAGGCGGTGAAGGGCAATCAGCTGTT  
GCCCCTCTCACTGGTGAAAAGAAAAACCACCCAGTACATTA AAAACGTCCGCAATGTGTTATTAAGTTGCTAA  
GCGTCAATTTGTTTACACCACAATATATCTCTGCCACCAGCCAGCCAACAGCTCCCCGACCGGCAGCTCGGCACAA  
AATCACCACCTCGATACAGGCAGCCCATCAGTCCGGGACGGCGTCAGCGGGAGAGCCGTTGTAAGGCGGCAGACTT  
TGCTCATGTTACCGATGCTATTCGGAAGAACGGCAACTAAGCTGCCGGGTTTGA AACACGGATGATCTCGCGGAG  
GGTAGCATGTTGATTGTAACGATGACAGAGCGTTGCTGCCTGTGATCAAATATCATCTCCCTCGCAGAGATCCGA  
ATTATCAGCCTTCTTATTCATTTCTCGCTTAACCGTGACAGGCTGTGATCTTGAGA ACTATGCCGACATAATAG  
GAAATCGCTGGATAAAGCCGCTGAGGAAGCTGAGTGGCGCTATTTCTTTAGAAAGTGAACGTTGACGATATCAACT  
CCCCTATCCATTGCTCACCGAATGGTACAGGTCCGGGACCCGAAGTTCCGACTGTCCGGCCTGATGCATCCCCGGC  
TGATCGACCCAGATCTGGGGCTGAGAAAGCCAGTAAGGAAACA ACTGTAGGTTTCGAGTCGCGAGATCCCCCGG  
AACCAAAGGAAGTAGGTTAAACCCGCTCCGATCAGGCCGAGCCACGCCAGGCCGAGA ACATGGTTCTCTGTAGGC  
ATCGGGATTGGCGGATCAAACACTAAAGCTACTGGAACGAGCAGAAGTCTCCGGCCGCCAGTTGCCAGGCGGTA  
AAGGTGAGCAGAGGCACGGGAGGTTGCCACTTGCGGGT CAGCACGGTTCCGAACGCCATGGAAACCGCCCCGCC  
AGGCCCGCTGCGACGCCGACAGGATCTAGCGCTGCGTTTGGTGTCAACACCAACAGCGCCACGCCCGCAGTTCCG  
CAAATAGCCCCAGGACCGCCATCAATCGTATCGGGCTACCTAGCAGAGCGGCAGAGATGAACACGACCATCAGC  
GGCTGCACAGCGCCTACCGTCGCCCGACCCCCGCCCGCAGGCGGTAGACCGAAATAAACAACAAGCTCCAGAAT  
AGCGAAATATTAAGTGCGCCGAGGATGAAGATGCGCATCCACCAGATTCCCGTTGGAATCTGTCCGACGATCATC  
ACGAGCAATAAACCCGCCGGCAACGCCCGCAGCAGCATAACGGCGACCCCTCGGCCTCGCTGTTCCGGGCTCCACG  
AAAACGCCGGACAGATGCGCCTTGTGAGCGTCTTGGGGCCGTCCTCTGT TTTGAAGACCGACAGCCCAATGATC  
TCGCCGTCGATGTAGGCGCCGAATGCCACGGCATCTCGCAACCGTTCAGCGAACGCCTCCATGGGCTTTTTCTCC  
TCGTGCTCGTAAACGGACCCGAACATCTCTGGAGCTTTCTTCAGGGCCGACAATCGGATCTCGCGGAAATCCTGC  
ACGTCCGGCCGCTCCAAGCCGTCGAATCTGAGCCTTAATCACAATTGTCAATTTTAATCCTCTGTTTTATCGGCAGT  
TCGTAGAGCGCGCCGTGCGTCCCAGCGATACTGAGCGAAGCAAGTGCCTCGAGCAGTGCCCGCTTGTTCCTGAA  
ATGCCAGTAAAGCGCTGGCTGCTGAACCCCCAGCCGGA ACTGACCCACAAGGCCCTAGCGTTTGAATGCACCA  
GGTCATCATTGACCCAGGCGTGTTCACCAGGCCGCTGCCTCGCAACTCTTCGCAGGCTTCGCCGACCTGCTCGC  
GCCACTTCTTCACGCGGGTGGAAATCCGATCCGCACATGAGGCGGAAGGTTTCCAGCTTGAGCGGGTACGGCTCCC  
GGTGCAGACTGAAATAGTCGAACATCCGTCGGGCCGTCGGCGACAGCTTGCGGTACTTCTCCCATATGAATTTTCG  
TG TAGTGGTCGCCAGCAAACAGCACGACGATTTCTCTCGTCGATCAGGACCTGGCAACGGGACGTTTTCTTGCCAC  
GGTCCAGGACGCGGAAGCGGTG CAGCAGCGACACCGATTCCAGGTGCCCAACGCGGTCCGGACGTGAAGCCCATCG  
CCGTCCGCTGTAGGCGCGACAGGCATTCCTCGGCCTTCGTGTAATACCGGCCATTGATCGACCAGCCCAGGTCCT  
GGCAAAGCTCGTAGAACGTGAAGGTGATCGGCTCGCCGATAGGGGTGCGCTTTCGCGTACTCCAACACCTGCTGCC  
ACACCAGTTTCGTATCGTCGGCCCGCAGCTCGACGCCGGTG TAGGTGATCTTCACGTCTTGTGACGTGAAAA  
TGACCTTGT TTTGCAGCGCCTCGCGCGGGATTTTCTTGTGTCGCGTGGTGAACAGGGCAGAGCGGGCCGTGTCGT  
TTGGCATCGCTCGCATCGTGTCCGGCCACGGCGCAATATCGAACAAGGAAAGCTGCATTTCTTGTATCTGCTGCT  
TCGTGTGTTTTCAGCAACGCGGCCTGCTTGGCCTCGCTGACCTGTTTTGCCAGGTCTTCGCCGGCGGTTTTTCGCT  
TCTTGGTTCGTATAGTTCTCTCGCTGTGATGGTCATCGACTTCGCCAAACCTGCCGCCTCTGTTTCGAGACGAC  
GCGAACGCTCCACGGCGGCCGATGGCGCGGGCAGGGCAGGGGGAGCCAGTTGCACGCTGTCCGCTCGATCTTGG  
CCGTAGCTTGTGACCATCGAGCCGACGGACTGGAAGGTTTCGCGGGGCGCACGCATGACGGTTCGGGCTTGGCA  
TGTTTTCGGCATCCTCGGGGAAAACCCCGCTCGATCAGTTCTTGCCTGTATGCCCTCCGGTCAAACGTCCGAT  
TCATTCACCCCTCCTTGGCGGATTGCCCGACTCACGCCGGGCAATGTGCCCTTATTCTGATTTGACCCGCTG  
GTGCCTTGGTGTCCAGATAATCCACTTATCGGCAATGAAGTCGGTCCCGTAGACCGTCTGGCCGCTCCTCTCGT  
ACTTGGTATTCGAATCTTGCCTGCACGAATACCAGCGACCCCTTGCCCAAATACTTGCCGTGGCCCTCGGCCT  
GAGAGCCAAAACACTTGATGCGGAAGAAGTCGGTGCCTCCTGCTTGTCCGGCATCGTTGCGCCACATCTAGG  
TACTAAAACAATTCATCCAGTAAAATATAATATTTTATTTTCTCCCAATCAGGCTTGATCCCAGTAAGTCAAAA  
AATAGCTCGACATACTGTTCTTCCCAGATATCCTCCCTGATCGACCCGACGCAGAAGGCAATGTCATAACCACTTG  
TCCGCCCTGCCGCTTCTCCAAGATCAATAAAGCCACTTACTTTGCCATCTTTCACAAAGATGTTGCTGTCTCCC  
AGGTCGCCGCTGGGAAAAGACAAGTTCCTCTTCGGGCTTTTCCGTCTTTAAAAAATCATAACAGCTCGCGCGGATCT  
TTAAATGGAGTGTCTTCTTCCAGTTTTTCGCAATCCACATCGGCCAGATCGTTATTAGTAAGTAATCCAATTCG  
GCTAAGCGGCTGTCTAAGCTATTCGTATAGGGACAATCCGATATGTCGATGGAGTGAAAGAGCCCTGATGCATCC  
GCATAACAGCTCGATAATCTTTTCAGGGCTTTGTTTCATCTTCATACTCTTCCGAGCAAAGGACGCCATCGGCCTCA  
CTCATGAGCAGATTGCTCCAGCCATCATGCCGTTCAAAGTGCAGGACCTTTGGAACAGGCAGCTTTCCTTCCAGC  
CATAGCATCATGTCCTTTTCCGTTCCACATCATAGGTGGTCCCTTTATAACGGCTGTCCGTCATTTTTAAATAT  
AGGTTTTTCATTTTCTCCCACCAGCTTATATACCTTAGCAGGAGACATTCCTTCCGTATCTTTTACGCAGCGGTAT

TTTTCGATCAGTTTTTTTCAATTCGGGTGATATTCTCATTTTAGCCATTTATTTATTTTCCCTCCTCTTTTCTACAGT  
ATTTAAAGATACCCCAAGAAGCTAATTATAACAAGACGAACTCCAATTCAGTTCCTTGCATTCTAAAACCTTA  
AATACCAGAAAACAGCTTTTTCAAAGTTGTTTTCAAAGTTGGCGTATAACATAGTATCGACGGAGCCGATTTTGA  
AACCACAATTATGGGTGATGCTGCCAACTTACTGATTTAGTGTATGATGGTGTTTTTTGAGGTGCTCCAGTGGCTT  
CTGTGTCTATCAGCTGTCCCTCCTGTTTACGCTACTGACGGGGTGGTGCGTAACGGCAAAGCACCAGCCGGACATC  
AGCGCTATCTCTGCTCTCACTGCCGTAACCATGGCAACTGCAGTTCACTTACACCGCTTCTCAACCCGGTACGC  
ACCAGAAAATCATTGATATGGCCATGAATGGCGTTGGATGCCGGGCAACAGCCCGCATTATGGGGCGTTGGCCTCA  
ACACGATTTTACGTCACTTAAAAAACTCAGGCCGCGAGTCGGTAACCTCGCGCATAACAGCCGGGCAGTGACGTCAT  
CGTCTGCGCGGAAATGGACGAACAGTGGGGCTATGTCCGGGCTAAATCGCGCCAGCGCTGGCTGTTTTACGCGTA  
TGACAGTCTCCGGAAGACGGTTGTTGCGCACGTATTCCGGTGAACGCACTATGGCGACGCTGGGGCGTCTTATGAG  
CCTGCTGTCAACCCTTTGACGTGGTGATATGGATGACGGATGGCTGGCCGCTGTATGAATCCCGCCTGAAGGGAAA  
GCTGCACGTAATCAGCAAGCGATATACGCAGCGAATTGAGCGGCATAACCTGAATCTGAGGCAGCACCTGGCAGC  
GCTGGGACGGAAGTCGCTGTCTGTTCTCAAAAATCGGTGGAGCTGCATGACAAAAGTCATCGGGCATTATCTGAACAT  
AAAACACTATCAATAAGTTGGAGTCATTACCCAATTATGATAGAATTTACAAGCTATAAGGTTATTGTCTGGGT  
TTCAAGCATTAGTCCATGCAAGTTTTTTATGCTTTGCCATTTCTATAGATATATTGATAAGCGCGCTGCCTATGCC  
TTGCCCCCTGAAATCCTTACATACGGCGATATCTTCTATATAAAAAGATATATTATCTTATCAGTATTGTCAATAT  
ATTCAAGGCAATCTGCCTCCTCATCCTCTTTCATCCTCTTTCGTCTTGGTAGCTTTTTTAAATATGGCGCTTCATAGA  
GTAATTCTGTAAAGGTCCAATTCCTCGTTTTTCATACCTCGGTATAATCTTACCTATCACCTCAAATGGTTTCGCTGG  
GTTTATCGCACCCCCGAACACGAGCACGGCACCCGCGACCACTATGCCAAGAATGCCAAGGTAAAAATTGCCGG  
CCCCGCCATGAAGTCCGTGAATGCCCCGACGGCCGAAGTGAAGGGCAGGCCGCCACCCAGGCCGCCGCCCTCACT  
GCCCGGCACCTGGTTCGCTGAATGTGATGCCAGCACCTGCGGCACGTCAATGCTTCCGGGGCTCGCGCTCGGGCT  
GATCGCCCATCCCGTTACTGCCCCGATCCCGGCAATGGCAAGGACTGCCAGCGCTGCCATTTTTGGGGTGAGGCC  
GTTTCGCGGCCGAGGGGCGCAGCCCCTGGGGGATGGGAGGCCCGCGTTAGCGGGCCGGGAGGGTTTCGAGAAGGGG  
GGGCACCCCCCTTCGGCGTGCAGCGGTACAGCGCACAGGGCGCAGCCCTGGTTAAAAACAAGTTTTATAAATATTG  
GTTTAAAAGCAGGTTAAAAGACAGGTTAGCGGTGGCCGAAAAACGGGCGGAAACCCTTGCAAATGCTGGATTTTC  
TGCCTGTGGACAGCCCCTCAAATGTCAATAGGTGCGCCCCCTCATCTGTGACACTCTGCCCTCAAGTGTCAAGG  
ATCGCGCCCCCTCATCTGTGAGTAGTGCAGCCCCCTCAAGTGTCAATACCGCAGGGCACTTATCCCCAGGCTTGTCC  
ACATCATCTGTGGAAACTCGCGTAAAATCAGGCGTTTTTCGCCGATTTGCGAGGCTGGCCAGCTCCACGTCGCCG  
GCCGAAATCGAGCCTGCCCTCATCTGTCAACGCCGCGCCGGGTGAGTCGGCCCCCTCAAGTGTCAACGTCGCCCC  
CTCATCTGTGAGTGGGGCCAAGTTTTCCGCGAGGTATCCACAACGCCGGCGGCCGGTGTCTCGCACACGGCT  
TCGACGGCGTTTCTGGCGCGTTTGCAGGGCCATAGACGGCCGCCAGCCAGCGGCGAGGGCAACCAGCCCCG

**Plasmid Stock 688, *ACA9*promoter::*ACA12-TAP2(YFP)*.** The *ACA9* promoter (gray shading) starts immediately after a unique *SbfI* site and ends just before a *Sall* site. The *ACA12* coding sequence (blue shading and italics) begins downstream of a unique *AscI* site, with the sequence *ATGAGGGACCTC* and ends with the sequence *CTCAAGAACCT*. Immediately downstream is a sequence encoding aYFP (yellowshading and italics) starting with the sequence ATGGTGAGCAAG. Following the YFP is a sequence encoding a tandem affinity tag, which ends with the stop codon (red highlight) at the end of the sequence *AAGTCAACCTGA*. This plant expression vector is based on a pGreenII backbone and harbors a kanamycin resistance marker for selection in bacteria and a hygromycin resistance marker for selection in plants. The *ACA9* promoter provides expression primarily in pollen.

```
TTTTTATCCCCGGAAGCCTGTGGATAGAGGGTAGTTATCCACGTGAAACCGCTAATGCCCGCAAAGCCTTGATT
CACGGGGCTTCCGGCCCGCTCCAAAACTATCCACGTGAAATCGCTAATCAGGGTACGTGAAATCGCTAATCGG
AGTACGTGAAATCGCTAATAAGGTCACGTGAAATCGCTAATCAAAAAGGCACGTGAGAACGCTAATAGCCCTTTC
AGATCAACAGCTTGCAAACACCCCTCGCTCCGGCAAGTAGTTACAGCAAGTAGTATGTTCAATTAGCTTTTCAAT
TATGAATATATATATCAATTATTGGTTCGCCCTTGGCTTGTGGACAATGCGCTACGCGCACCGGCTCCGCCCGTGG
ACAACCGCAAGCGGTTGCCACCGTTCGAGCGCCAGCGCCTTGGCCACAACCCGGCGGCCGGCCGAACAGATCG
TTTTATAAATTTTTTTTTTTTGA AAAAGAAAAAGCCGAAAGGCGGCAACCTCTCGGGCTTCTGGATTTCCGATCC
CCGGAATTAGAGATCTTGGCAGGATATATTGTGGTGTAACTTATCGATCTGGATTTTACTGACTGGATTTTGGTT
TTAGGAATTAGAAATTTTATTGATAGAAGTATTTTACAAATACAAATACATACTAAGGGTTTCTTATATGCTCAA
CACATGAGCGAAACCCCTATAAGAACCCTAATTTCCCTTATCGGGAACTACTCACACATTATTTATGGAGAAAAT
AGAGAGAGATAGATTTGTAGAGAGAGACTGGTGTATTTACGCGTACCGAATTAATTTCTCCCGCGACCAGCCGAGCG
AGCTTAGCGAACTGTGGACGAGAAGTGTGCCACCAAGCGTAAGGCCGTTCTCTCGCATTTGCCCTTGCTAGGCTCG
CGCGAGTTGCTGGCTGAGGCGTTCTCGAAATCAGCTCTTGTTCGGTTCGGCATCTACTCTATTCCTTTGCCCTCGG
ACGAGTGTGGGGCGTCCGTTTCCACTATCGGCGAGTACTTCTACACAGCCATCGGTCCAGACGGCCCGCGCTTCT
GCGGGCGATTTGTGTACGCCCAGAGTCCCAGGCTCCGGATCGGACGATTGCGTTCGCATCGACCCTGCGCCCAAGC
TGCATCATCGAAATTGCCGTCAACCAAGCTCTGATAGAGTTGGTCAAGACCAATGCGGAGCATATACGCCCGGAG
GCGTGGCGATCCTGCAAGCTCCGGATGCCTCCGCTCGAAGTAGCGCGTCTGCTGCTCCATAACAAGCCAACCAGG
CCTCCAGAAGAAGATGTTGGCGACCTCGTATTGGGAATCCCCGAACATCGCCTCGCTCCAGTCAATGACCGCTGT
TATGCGGCCATTGTCCGTACAGGACATTGTTGGAGCCGAAATCCGCGTGCACGAGGTGCCGGACTTCCGGGGCAGTC
CTCGGCCCAAAGCATCAGCTCATCGAGAGCCTGCGCGACGGACGCACTGACGGTGTGCTCCATCACAGTTTGCCA
GTGATACACATGGGGATCAGCAATCGCGCATATGAAATCACGCCATGTAGTGTATTGACCGATTCTTTGCGGTCC
GAATGGGCCGAACCCGCTCGTCTGGCTAAGATCGGCCGACGCGATCGCATCCATAGCCTCCGCGACCGGCTGAAG
AACAGCGGGCAGTTCCGGTTTTCAGGCAGGTCTTGCAACGTGACACCCTGTGCACGGCGGGAGATGCAATAGGTCAG
GCTCTCGCTGAACTCCCCAATGTCAAGCACTTCCGGAATCGGGAGCGCGGCCGATGCAAAGTGCCGATAAACATA
ACGATCTTTGTAGAAACCATCGGCGCAGCTATTTACCCGACAGGACATATCCACGCCCTCTACATCGAAGCTGAA
AGCACGAGATCTTTCGCCCTCCGAGAGCTGCATCAGGTCCGAGACGCTGTGCAACTTTTCGATCAGAAACTTCTC
GACAGACGTCGCGGTGAGTTTTCAGGCTTTTTCATAGGGATCAGCTTGGGCTGTCTCTCCAAATGAAATGAACTTC
CTTATATAGAGGAAGGGTCTTGC GAAGGATAGTGGGATTGTGCGTCATCCCTTACGTGAGTGGAGATGTCACATC
AATCCACTTGCTTTGAAGACGTGGTTGGAACGTCTTCTTTTCCACGATGCTCCTCGTGGGTGGGGTCCATCTT
TGGGACCACTGTCCGCGAGAGGCATCTTGAATGATAGCCTTTCTTTTATCGCAATGATGGCATTGTTAGGAGCCAC
CTTCTTTTCTACTGTCTTTTCGATGAAGTGACAGATAGCTGGGCAATGGAATCCGAGGAGGTTTCCCGAAATTA
CCTTTGTGAAAAGTCTCAATAGCCCTTTGGTCTTCTGAGACTGTATCTTTGACATTTTGGAGTAGGGGTACG
ATAACATTAACGTTTACAATTTTCGCGCCATTCGCCATTCAGGCTGCGCAACTGTTGGGAAGGGCGATCGGTGCGG
GCCTCTTCGCTATTACGCCAGCTGGCGAAAAGGGGATGTGCTGCAAGGCGATTAAGTTGGGTAAACGCCAGGGTTT
TCCAGTCACGACGTTGTA AAAACGACGGCCAGTGAATTGTAATACGACTCACTATAGGGCGAATTGGGTACCCCT
GCAGGAAGCTTGAAGTGAAGAACCATTTGGAAGCAAGAAAAGGATCTCAAACAAAAACAGTTGTTATCATTTTCAATTT
GATGATGGAATCGAATCTGAGTTGTGTTTAGGGTTTCTCTGGGTTAATCTCAGTCTATGTGGGCACATTTTAGTC
TTCTACAAATTATAAGACACTTTCACCTTATTAGAAAGCTCACTCATCAGAAAAGAAAAAAAAAACTTTGCTCAG
TCTCTCATCTGTGTGTTTATTATTTTTTTCAGGCAGAAAACTTTTTTTTTGTCTTGTATTGATTACAATTAGTT
AAATATTTAAGACTTAGTAGAGATAATGCAATCTATGTATAAAAATAGAAACAATGATTGGTTATGTCGTGCAAC
CCAAGTGACCTTAATGTCGTACACACGTTTCATCAGGTTAAAACGAAATTTCTCAGCAACTTCACTATTCTCTCTG
TCACATTGTTTTATTCTTTTCCATTATCTTTATTGGAAACTTGATTAGAAAGAACTGATTAAGGTATGAAGATAA
```

TTAGTGTACCATTCTTCACATGATACGAGGTGAACAATAGTATATCAGAATACTAGAATAATTTTATAAGTTATA  
AAGATGAATGGTATACCCTTATTACAAAACGAAAACATAGTTAGATCTGAGAAGAAGGAAAGATTTTTGTTTTA  
AAAAATGAGATGGTTAGATATATGCCATGTTAAGAGATGCCACCATGTTCTTCTTCTTCTTCTTACCCGGAAAA  
ACTCTTTCTTCTTCTTCTTCCATAAAAAAGAAACAAAAAAACTAACTTCCCACAAATTTTGCCAAACCAAACC  
AAAAATAGTAATGATCTCATTTCAATTTGAACCCTCTCTCCATTTTCTTTCATAGTTTTTTTTTTAGGGTAAATCAA  
AATATTAATGTTGGTTAGAACTCAAAAATTAGTTTCTCTTTTTTTTTCTCTGTGATTGACAGAGAGGTAAGAGAA  
AAAAAGAGAGAAAGTGTTCGGTTTTTGTTCGCTTCTCTCGAGTTAGGCCTTCTCTCTTCCGTACACCATCAT  
TTTTTTTTCTCATAACGACCAAATCATAAAACCGGTCGTTCCATTTTTTTCTTCTCTGCGTTTTTTGTTCGAA  
TTCTTCAATAGAATTTTAAAAAGAAAGAAGAAAGCTGGGTGAGACGAAGGAAGGAAGAGTCGACGGCGCGCCCGGT  
ATGAGGGACCTCAAGGAATATGATTACAGTGCACTTTTGCTCAACCTTACCACCTCCAGCCTCAACAAGGCCAG  
AGGCGTTGGCGTTTTTGCTACGCTGCCATCTACTCTATGAGGGCTATGCTCTCTCTTGTAAAGGAGATAGTCCC  
GCAAGGATTGATCCCAAAACCTCAGATGCCCTCTCTCTCTCTCTCTACACAGCCCTCGAGTCCGGTGAGGGAGCA  
AAGATCAACTCTATGCCTCTCTTACGTTCCCTGCCATTGATCAAGAACAACCTGTGGAGATCATGAAGGGTAAG  
GACTTACCGGGCATCCAAGCGCTGGGCGCGTGGAGGGTGTGCGCGCTTCCCTTAGGACTAACCCCAACAAAGGG  
ATCCACGGGAATGAGCAAGAAGTCAGTAGACGCCGTGACCTCTTTGGCTCTAACACCTACCATAAGCCACCGCCT  
AAAGGACTTCTCTTCTTGTGTATGAAGCTTCAAAGACCTAACCATCTTGATCTTGTGGTCTGCGCTATTTTC  
TCCCTTGGCTTCGGTATCAAAGAACATGGCATCAAAGAAGTTGGTATGAAGGCGGAAGCATCTTGTAGCAGTC  
TTCTTGGTCATAGTTGTCTCTGCTCTCAGCAACTTTAGGCAGGAGAGACAGTTCGACAAGCTGTCCAAGATAAGC  
AATAACATCAAAGTGGAAGTCTTCGGGACAGCAGGCGGCAACATATCTCCATCTTTGACGTTGTTGTTGGTGAT  
GTTGTCTTCTTGAAGATCGGAGATCAGATTCCCGCTGATGGTCTGTTCTTGGAAAGGGCATTCACTTCAGGTGGAC  
GAGTCTAGTATGACAGGAGAGAGTGACCATCTTGAAGTGACCACAAGGATAATCCCTTCTTGTCTCAGGGACA  
AAGATAGTCGATGGGTTTGGCTCAAATGCTCGTTGTCTCTGTGGGTATGAGTACAACCTGGGGACAGACGATGAGC  
TCCATAAATCAAGATTCAGCGAGAGAACACCTTTGCAAGTCCGTCTTGACACGCTGACCTCCACCATCGGAAAA  
ATTGGTCTTACGGTGGCAGCACTTGTCTGGTAGTTCTATTAGTCCGTTACTTCACTGGGAACACAGAGAAAAGAG  
GGCAAAAGAGAATACAACGGGAGCAAAAACCTGTGGACACTGTGGTCAATTCCGTTGTGCGAATCGTGGCAGCT  
GCAGTAACCATTGTGCTAGTAGCTATCCAGAAGGCTTGCCATTGGCTGTGACTCTGACGCTGGCTTACTCCATG  
AAGAGAATGATGTCTGATCAAGCTATGGTCAGAAAGCTCTCGGCATGCGAGACGATGGGCTCAGCGACAGTGATA  
TGCACAGACAAAACAGGTACTTTAACTGAACGAGATGAAGGTTACCAAGTTTTTGGCTTGGCCAAGAGTCAATC  
CATGAAGACTCTACCAAAATGATCTCACCAGACGTTCTTGATCTGCTTTACCAAGGCACCGGTCTGAACACAACG  
GGAAGTGTCTGTGTGTCAGACTCAGGATCAACGCCTGAGTCTCAGGCAGTCCAACAGAGAAGGCCCTCTTGTCT  
TGGACTGTGCTAAATCTGGGTATGGATATGGAGTCAGTAAAGCAGAAAACATGAAGTTCTCCGCGTTGAAACTTTC  
AGTTCAGCAAAGAAAAGAAGCGGAGTTTTGGTCCGAAGAAAATCTGACAATACAGTCCATGTACACTGGAAAGGA  
GCCGCTGAAATGGTCTAGCTATGTGTTCTCACTACTACACAAGCACTGGGTCTGTTGACTTAATGGACTCCACC  
GCAAAGAGCAGAATTCAGGCAATAATCCAAGGTATGGCGGCCAGTAGCCTCAGATGCATAGCATTGCTCATAAA  
ATAGCGTCAAATGACTCGGTATTAGAGGAAGATGGCTTGACCTTGATGGGAATAGTGGGTCTGAAAGATCCTTGT  
CGACCTGGTGTCTCAAAGCTGTGGAAACTTGCAAACCTGCAGGAGTCACCATTAAGATGATAACGGGAGATAAT  
GTTTTCACTGCAAAGCTATCGTTTTTGAATGCGGAATCCTCGACCACAATGACAAAGATGAAGAAGATGCTGTT  
GTAGAAGGTGTTCAATTCAGAAATTATACGGACGAAGAGAGAATGCAGAAAGTTGATAAGATCCGGGTGATGGCA  
AGGTCTCTCCCTCCGACAAGCTTCTAATGGTCAAGTGTCTGAGACTTAAAGGCCATGTGGTAGCCGTCACAGGG  
GATGGCACCAACGATGCACCTGCCTAAAAGAAGCAGATATTGGACTCTCTATGGGAATTCAGGGCACTGAAGTG  
GCAAAGAAAAGCTCAGACATTGTAATTCTAGATGATAACTTCGCATCCGTTGCCACAGTCTTAAATGGGGAAGG  
TGTGTCTACAACAATATCCAGAAATTCATTGAGTTTTCAGCTAACAGTGAACGTTGCAGCTCTTGTGATCAATTTT  
ATCGCAGCAATTCAGCCGGTGAGGTCCCTTTGACAGCAGTTCAACTGCTGTGGGTAAACCTCATCATGGACACA  
TTGGGAGCTCTGGCTCTCGCCACGGAGCGACCCACTAACGAGCTCCTGAAGAGAAAAGCCAGTTGGCCGAACAGAG  
GCCCTGATAACAAATGTCATGTGGAGGAATCTCCTGGTTCAGTCATTATATCAAATAGCCGTACTIONTGTGATCTTA  
CAATTCAGGGTATGTCAATATTCAGTGTTCGCAAGGAAGTGAAGGACACGCTCATATTCAACACTTTCGTGCTC  
TGTCAAGTTTTTAAACGAATTCATGCGAGGGAGATGGAGAAGAAAAATGTGTTCAAAGGCCCTCACAGAAACAGG  
TTGTTCAATGGAATAATAGCGATAACTATTGTGCTTCAAGTCATTATGGTGGAAATTCCTAAAGAAGTTTGGCGAT  
ACAGTAAGGCTTAAACGGGTGGCAATGGGGAACCTGCATAGCACTTGCATCCCTTTCATGGCCGATCGGCTTTTTT  
ACAAAATTCATACCTGTTTCTGAGACACCATTCTCAGTTACTTTAAGAAATCCAAGATCCTTATTTAAGGGTTCA  
AGAAGCCCATCTCTCAAGAAACCTGGACTAGTGATGGTGAGCAAGGGCGAGGAGCTTTTCACTGGAGTTGTCCCA  
ATTCTTGTGTAATTAGATGGTGATGTTAATGGGCACAAATTTTCTGTGAGTGGAGAGGGTGAAGGTGATGCAACA  
TACGGAAAACCTTACCCTTAAATTTATTTGCACTACTGGAAAACCTGTTCCATGGCCAACCTGGTCAACCACC  
TTCGGCTACGGCGTGCAGTGTCTCGCGCTTATCCGGACCATATGAAGCGGCACGACTTCTTCAAGAGCGCCATG

CCTGAGGGATACGTGCAGGAGAGGACCATCTTCTTCAAGGACGACGGGAAC TACAAGACACGTGCTGAAGTCAAG  
TTTGAGGGAGACACCCTCGTCAACAGGATCGAGCTTAAGGGAATCGATTTC AAGGAGGACGGAAACATCCTCGGC  
CACAAGTTAGAATACAAC TACAAC TCCCACAACGTATACATCATGGCCGACAAGCAAAAAGAACGGCATCAAAGCC  
AACTTCAAGACCCGCCACAACATCGAAGACGGCGGGCTGCAACTCGCTGATCATTATCAACAAAATACTCCAATT  
GGCGATGGCCCTGTCCTTTTACCAGACAACCATTACCTGTGCTACCAGTCCGCCCTTTTCGAAAGATCCCAACGAA  
AAGAGAGACCACATGGTCTTCTTGAGTTTGTAAACAGCTGCTGGGATTACACATGGCATGGATGAACTATACAAG  
GGTCTAGACCCGGGAATGCATCACCATCACCATCACGGATCCGATTATGATATTCCAAC TACTGCTAGTGAGAAT  
TTGTATTTTCAGGGTGAAC TGAACACCGCGGCTCTTGCGCAACACGATGAAGCCGTGGACAACAAATTCAACAAA  
GAACAACAAAACGCGTTCTATGAGATCTTACATTTACCTAACTTAAACGAAGAACAACGAAACGCCTTCATCCAA  
AGTTTAAAAGATGACCCAAGCCAAAGCGCTAACCTTTTAGCAGAAGCTAAAAGCTAAATGATGCTCAGGCGCCG  
AAAGTAGACAACAAATTCAACAAAGAACAACAAAACGCGTTCTATGAGATCTTACATTTACCTAACTTAAACGAA  
GAACAACGAAACGCCTTCATCCAAAGTTTAAAAGATGACCCAAGCCAAAGCGCTAACCTTTTAGCAGAAGCTAAA  
AAGCTAAATGGTGCTCAGGCGCCGAAAGTAGACGCGAATTCGCGGGGGAAGTCAACC TGA GAGCTCGAATTTCCC  
CGATCGTTCAAACATTTGGCAATAAAGTTTCTTAAAGATTGAATCCTGTTGCCGGTCTTGCGATGATTATCATATA  
ATTTCTGTTGAATTACGTTAAGCATGTAATAATTAACATGTAATGCATGACGTTATTTATGAGATGGGTTTTTAT  
GATTAGAGTCCCGCAATTATACATTTAATACGCGATAGAAAACAAAATATAGCGCGCAAAC TAGGATAAAATTATC  
GCGCGCGGTGTCATCTATGTTACTAGATCGGGAATTCAGCTTTTGTTCCTTTAGTGAGGGTTAATTCCGAGCTT  
GGCGTAATCATGGTCATAGCTGTTTCCTGTGTGAAATTGTTATCCGCTCACAAATTCACACAACATACGAGCCGG  
AAGHCATAAAGTGTAAGCCTGGGGTGCCTAATGAGTGAGCTAACTCACATTAATTGCGTTGCGCTCACTGCCCG  
CTTTCCAGTCGGGAAACCTGTCGTGCCAGCTGCATTAATGAATCGGCCAACGCGCGGGGAGAGGCGGTTTTGCGTA  
TTGGGCGCTCTTCCGCTTCCGCTCACTGACTCGCTGCGCTCGGTGCTCGGCTGCGGGCAGCGGTATCAGCTC  
ACTCAAAGGCGGTAATACGGTTATCCACAGAATCAGGGGATAACGCAGGAAAGAACATGAAGGCCTTGACAGGAT  
ATATTGGCGGGTAAACTAAGTCGCTGTATGTGTTTTGTTT GAGATCTCATGTGAGCAAAAAGGCCAGCAAAAAGCCA  
GGAACCGTAAAAGGCCGCGTGTGCGGTTTTTCCATAGGCTCCGCCCTTGACGAGCATCACAAAAATCGAC  
GCTCAAGTCAGAGGTGGCGAAACCCGACAGGACTATAAAGATACCAGGCGTTTCCCCCTGGAAGCTCCCTCGTGC  
GCTCTCCTGTTCCGACCCTGCCGCTTACCGGATACCTGTCCGCCTTTCTCCCTTCGGGAAGCGTGGCGCTTTCTC  
ATAGCTCACGCTGTAGGTATCTCAGTTCCGGTGTAGGTGCTTCCGCTCCAAGCTGGGCTGTGTGCACGAACCCCCG  
TTCAGCCCGACCGCTGCGCCTTATCCGGTAACTATCGTCTTGAGTCCAACCCGGTAAAGACAGACTTATCGCCAC  
TGGCAGCAGCCACTGGTAAACAGGATTAGCAGAGCGAGGTATGTAGGCGGTGCTACAGAGTTCTTGAAGTGGTGGC  
CTAACTACGGCTACACTAGAAGAACAGTATTTGGTATCTGCGCTCTGCTGAAGCCAGTTACCTTCGGAAGAAGAG  
TTGGTAGCTCTTGATCCGGCAAACAACACCAGCTGGTAGCGGTGGTTTTTTTTGTTTGAAGCAGCAGATTACGC  
GCAGAAAAAAGGATCTCAAGAAGATCCTTTGATCTTTTTCTACGGGGTCTGACGCTCAGTGGAACGAAAAC TAC  
GTTAAGGGATTTTGGTCATGAGATTATCAAAAAGGATCTTCACCTAGATCCTTTTTAAAT TAAAATGAAGTTTTA  
AATCAATCTAAAGTATATATGTGTAACATTTGGTCTAGTGATTAGAAAAACTCATCGAGCATCAAATGAAACTGCA  
ATTTATTCATATCAGGATTATCAATACCATATTTTTTGAAAAAGCCGTTTCTGTAATGAAGGAGAAAAC TACC  
GGCAGTTCCATAGGATGGCAAGATCCTGGTATCGGTCTGCGATTCCGACTCGTCCAACATCAATACAACCTATTA  
ATTTCCCTCGTCAAAAATAAGGTTATCAAGTGAGAAATCACCATGAGTGACGACTGAATCCGGTGAGAATGGCA  
AAAGTTTATGCATTTCTTTCCAGACTTGTTCAACAGGCCAGCCATTACGCTCGTCATCAAAAATCACTCGCATCAA  
CCAAACCGTTATTCATTCGTGATTGCGCCTGAGCGAGACGAAATACGCGATCGCTGTTAAAAGGACAATTACAAA  
CAGGAATCGAATGCAACCGGCGCAGGAACACTGCCAGCGCATCAACAATATTTTACCTGAATCAGGATATCTTT  
CTAATACCTGGAATGCTGTTTTCCCTGGGATCGCAGTGGTGAGTAACCATGCATCATCAGGAGTACGGATAAAAT  
GCTTGATGGTTCGGAAGAGGCATAAATTCCGTCAGCCAGTTTAGTCTGACCATCTCATCTGTAACAACATTTGGCAA  
CGCTACCTTTGCCATGTTTCAGAAACAAC TCTGGCGCATCGGGCTTCCCATACAATCCGGTAGATTGTCGCACCTG  
ATTGCCCCGACATTATCGCGAGCCATTTATACCCATATAAATCAGCATCCATGTTGGAATTTAATCGCGGCCCTG  
AGCAAGACGTTTCCCGTTGAATATGGCTCATAACACCCCTTGTATTACTGTTTATGTAAGCAGACAGTTTTATTG  
TTCATGATGATATATTTTTATCTTGTGCAATGTAACATCAGAGATTTTGAGACACAACGTGGCTTTGTTGAATAA  
ATCGAACTTTTGTGAGTTGAAGGATCAGATCACGCATCTTCCGACAACGCAGACCGTTCCGTGGCAAAGCAA  
AGTTCAAAATCACCAACTGGTCCACCTACAACAAAGCTCTCATCAACCGTGGCTCCCTCACTTTCTGGCTGGATG  
ATGGGGCGATT CAGGCGATCCCATCCAACAGCCCGCGCTCGAGCGGGCT



**Plasmid Stock 585, *ACA9*promoter::*ACA2-TAP2(GFP)*.** The *ACA9* promoter (gray shading) starts immediately after a unique *SbfI* site and ends just before a *Sall* site. The *ACA2* coding sequence (blue shading and italics) begins downstream of the *Sall* site, with the sequence *ATGGAGAGTTAC* and ends with the sequence *AAGACGATTCCG*. Immediately downstream is a GFP coding sequence (greenshading and italics) starting with the sequence *ATGGTGAGCAAG*. Following the GFP is a sequence encoding a tandem affinity tag, which ends with the stop codon (red highlight) at the end of the sequence *AAGTCAACCTGA*. This plant expression vector is based on a pGreenII backbone and harbors a kanamycin resistance marker for selection in bacteria and a hygromycin resistance marker for selection in plants. The *ACA9* promoter provides expression primarily in pollen.

```
TTTTTATCCCCGGAAGCCTGTGGATAGAGGGTAGTTATCCACGTGAAACCGCTAATGCCCGCAAAGCCTTGATT
CACGGGGCTTTCGGGCCCGCTCCAAAACTATCCACGTGAAATCGCTAATCAGGGTACGTGAAATCGCTAATCGG
AGTACGTGAAATCGCTAATAAGGTCACGTGAAATCGCTAATCAAAAAGGCACGTGAGAACGCTAATAGCCCTTTC
AGATCAACAGCTTGCAAACACCCCTCGCTCCGGCAAGTAGTTACAGCAAGTAGTATGTTCAATTAGCTTTTCAAT
TATGAATATATATATCAATTATTGGTTCGCCCTTGGCTTGTGGACAATGCGCTACGCGCACCGGCTCCGCCCGTGG
ACAACCGCAAGCGGTTGCCACCGTCGAGCGCCAGCGCCTTGGCCACAACCCGGCGGCCGCGCAACAGATCG
TTTTATAAATTTTTTTTTTTGAAAAAGAAAAAGCCGAAAGGCGGCAACCTCTCGGGCTTCTGGATTTCCGATCC
CCGGAATTAGAGATCTTGGCAGGATATATTGTGGTGTAACTTATCGATCTGGATTTTACTGACTGGATTTTGGTT
TTAGGAATTAGAAATTTTATTGATAGAAGTATTTTACAAATACAAATACATACTAAGGGTTTCTTATATGCTCAA
CACATGAGCGAAACCCTATAAGAACCCTAATTTCCCTTATCGGGAACTACTCACACATTTTATGGAGAAAAT
AGAGAGAGATAGATTTGTAGAGAGAGACTGGTATTTCAGCGTACCGAATTAATTCTCCCGCGACCAGCCGAGCG
AGCTTAGCGAACTGTGGACGAGAAGTGTGCCACCAAGCGTAAGGCCGTTCTCTCGCATTTGCCTTGCTAGGCTCG
CGCGAGTTGCTGGCTGAGGCGTTCTCGAAATCAGCTCTTGTTCGGTCGGCATCTACTCTATTCCTTTGCCCTCGG
ACGAGTGTGGGGCGTCCGTTTCCACTATCGGCGAGTACTTCTACACAGCCATCGGTCCAGACGGCCGCGCTTCT
GCGGGCGATTTGTGTACGCCCAGTCCCAGCTCCGGATCGGACGATTGCGTCGCATCGACCCTGCGCCCAAGC
TGCATCATCGAAATTGCCGTCAACCAAGCTCTGATAGAGTTGGTCAAGACCAATGCGGAGCATATACGCCCGGAG
GCGTGGCGATCCTGCAAGCTCCGGATGCCTCCGCTCGAAGTAGCGCGTCTGCTGCTCCATAAAGCCAACCAGG
CCTCCAGAAGAAGATGTTGGCGACCTCGTATTGGGAATCCCCGAACATCGCCTCGCTCCAGTCAATGACCGCTGT
TATGCGGCCATTGTCCGTGAGGACATTGTTGGAGCCGAAATCCGCGTGCACGAGGTGCCGGACTTCGGGGCAGTC
CTCGGCCCAAAGCATCAGCTCATCGAGAGCCTGCGCGACGGACGCACTGACGGTGTGCTCCATCACAGTTTGCCA
GTGATACACATGGGGATCAGCAATCGCGCATATGAAATCACGCCATGTAGTGTATTGACCGATTCTTTGCGGTCC
GAATGGGCCGAACCCGCTCGTCTGGCTAAGATCGGCCGACGCGATCGCATCCATAGCCTCCGCGACCGGCTGAA
AACAGCGGGCAGTTCCGTTTTCAGGCAGGTCTTGCAACGTGACACCCTGTGCACGGCGGGAGATGCAATAGGTCAG
GCTCTCGCTGAACTCCCCAATGTCAAGCACTTCCGGAATCGGGAGCGCGGCCGATGCAAAGTGCCGATAAACATA
ACGATCTTTGTAGAAACCATCGGCGCAGCTATTTACCCGACAGGACATATCCACGCCCTCCTACATCGAAGCTGAA
AGCACGAGATCTTTCGCCCTCCGAGAGCTGCATCAGGTCCGAGACGCTGTGCAACTTTTCGATCAGAAACTTCTC
GACAGACGTCGCGGTGAGTTTTCAGGCTTTTTCATAGGGATCAGCTTGGGCTGTCTCTCCAAATGAAATGAACTTC
CTTATATAGAGGAAGGGTCTTGCGAAGGATAGTGGGATTGTGCGTCATCCCTTACGTCAGTGGAGATGTCACATC
AATCCACTTGCTTTGAAGACGTGGTTGGAACGTCTTCTTTTCCACGATGCTCCTCGTGGGTGGGGTCCATCTT
TGGGACCACTGTCCGCGAGAGGCATCTTGAATGATAGCCTTTCCTTTATCGCAATGATGGCATTGTAGGAGCCAC
CTTCCTTTTCTACTGTCTTTTCGATGAAGTGACAGATAGCTGGGCAATGGAATCCGAGGAGGTTTCCCGAAATTA
CCCTTTGTTGAAAAGTCTCAATAGCCCTTTGGTCTTCTGAGACTGTATCTTTGACATTTTGGAGTAGGGGTACG
ATAACATTAACGTTTACAATTTTCGCGCCATTCGCCATTCAGGCTGCGCAACTGTTGGGAAGGGCGATCGGTGCGG
GCCTCTTCGCTATTACGCCAGCTGGCGAAAAGGGGATGTGCTGCAAGGCGATTAAGTTGGGTAAACGCCAGGGTTT
TCCAGTCACGACGTTGTAACACGACGGCCAGTGAATTGTAATACGACTCACTATAGGGCGAATTGGGTACCCCT
GCAGGAAGCTTGAAGTGAAGAACCATTTGGAAGCAAGAAAGGATCTCAAACAAAAACAGTTGTTATCATTTTCAATTT
GATGATGGAATCGAATCTGAGTTGTGTTTGGGTTTCTCTGGGTTAATCTCAGTCTATGTGGGCACATTTTAGTC
TTCTACAAATTATAAGACACTTTCACCTTATTAGAAAGCTCACTCATCAGAAAAGAAAAAAAAAACTTTGCTCAG
TCTCTCATCTGTGTGTTTATTATTTTTCAGGCAGAAAACTTTTTTTTTGTCTTGTATTGTATTACAATTAGTT
AAATATTTAAGACTTAGTAGAGATAATGCAATCTATGTATAAAAATAGAAACAATGATTGGTTATGTGCTGCAAC
CCAAGTGACCTTAATGTGCTACACACGTTTCATCAGGTTAAAACGAAATTTCTCAGCAACTTCACTATTCTCTCTG
TCACATTGTTTTATTCTTTTCCATTATCTTTATTGGAAACTTGATTAGAAAGAACTGATTAAGGTATGAAGATAA
TTAGTGTACCATTCTTCACATGATACGAGGTGAACAATAGTATATCAGAATACTAGAATAATTTTATAAGTTATA
```

AAGATGAATGGTATACCACTTATTACAAAACGAAAACATAGTTAGATCTGAGAAGAAGGAAAGATTTTTGTTTTA  
AAAAATGAGATGGTTAGATATATGCCATGTTAAGAGATGCCACCATGTTCTTCTTCTTCTTCTTACCCGGAAAAA  
ACTCTTTCTTCTTCTTCTTCCATAAAAAAGAAACAAAAAAACTAACTTCCCACAAATTTTGCCAAACCAAACC  
AAAAATAGTAATGATCTCATTCAATTTGAACCCTCTCTCCATTTTCTTTCATAGTTTTTTTTTTAGGGTAAATCAA  
AATATTAATGTTGGTTAGAAACTCAAAAATTAGTTTCTCTTTTTTTTTCTCTGTGATTGACAGAGAGGTAAGAGAA  
AAAAAGAGAGAAAGTGTTCGGTTTTTGTGTCCTTCTCTCGAGTTAGGCCTTCTCTCTTCCGTACACCATCAT  
TTTTTTTTCTCATAACGACCAAATCATAAAACCGGTTCGTTCCTATTTTTTCTTCTCTGCGTTTTTTGTTTCGAA  
TTCTTCAATAGAATTTTAAAAAGAAAGAAGAAAGCTGGGTGAGACGAAGGAAGGAAGAGTCGACATGGAGAGTTAC  
CTAAACGAGAATTTTCGATGTGAAAGCGAAGCATTCTTCAGAGGAAGTGCTTGAGAAATGGCGTAATCTCTGTGGC  
GTTGTTAAGAACCCTAAACGTCGGTTTTCGTTTACCCTAATCTTTGAAACGCTATGAAGCCGCGGGCATGCGT  
CGCACCAACCAGGAGAAATTAAGGATCGCTGTTCTTGTTCCAAAGCTGCTTCCAATTTATCTCTGGTGTTTCT  
CCAAGTGACTIONACTGTCCCTGAAGATGTCAAAGCTGCTGGCTTTGAGATTTGTGCTGACGAATTAGGATCAATT  
GTTGAAAGTCATGATGTTAAGAAGCTCAAGTTCATGGTGGAGTTGATGGGCTTGACAGGTAAGCTCAAGGCATCT  
CCCACAGATGGCCTTTCTACTGAGGCTGCTCAGTTATCCCAAAGGCAAGAGCTTTTCGGAATCAACAAGTTTGCA  
GAGAGCGAAAATGAGGGGTTTCTGGGTGTTTGTATGGGAAGCTCTTCAGGATATGACTCTTATGATTCTTGGTGTT  
TGTGCTTTCTGTCTTTGATTGTTGGGATAGCTACTGAAGGATGGCCTAAAGGATCACATGATGGTCTTGGCATT  
GCGGCTAGTATTCTTGGTGTGTTTGTACAGCTACTAGCGATTACCGCCAGTCTTTCAGTTCGGTGATTTG  
GATAAAGAGAAGAAGAAGATCACTGTTTCAAGGTGACAAGGAACGGGTTTAGACAGAACTGTGCAATTTACGACTTG  
CTTCTGGTGACATTGTTTCACTGCGGATTGGAGATCAGGTTCTGCTGATGGTCTTTTCTCTCGGGATTCTCT  
GTGGTGATAGATGAATCGAGTTTACTGTTGAAAGTGAGCCTGTGATGGTGAATGCGCAGAATCCTTCTTATG  
TCTGGAACCAAAGTGCAAGATGGATCTTGTAAAGATGATGATTACTACAGTTGGGATGAGGACTCAATGGGGAAAG  
CTAATGGCGACTTTGACCGAAGGAGGGGATGATGAAACTCCACTGCAGGTGAAACTCAATGGAGTTGCTACCATC  
ATTGGCAAAAATTGGTCTTTTCTTTCGGGTGGTTACTTTTCGCGGTTCTGGTGCAAGGAATGTTTATGAGGAAGCTT  
TCAACGGGAACTCACTGGGCTGGTCTGGTGATGAAGCATTGGAGCTCTTGGAAACTTTGCTATTGCTGTGACA  
ATCGTTGTGGTTGCGGTTCTTGAAGGATTGCCTTTAGCTGTGACTCTAAGTCTTGCCTTGGCATGAAGAAAATG  
ATGAACGATAAAGCTCTTGTGAGGCATTTAGCAGCATGTGAGACTATGGGATCTGCAACGACGATTTGCAGTGAC  
AAGACTGGTACACTCACAAACCAATCACATGACCGTTGTGAAGTCTTGCATTTGCATGAATGTGCAAGATGTAGCA  
AATAAAGGTTCTAGCTTGAATCAGAAAATCCCGGAATCTGCGGTGAAGTTGTTGATTCAATCGATTTTCAATAAC  
ACAGGAGGCGAAGTTGTTGTCAACAAACATGGGAAAACCGAGCTTTTGGGGACGCCAACAGAGACTGCTATATTA  
GAGTTGGGGTTATCTCTTGGAGGTAAGTTCCAAGAAGAGAGGAAGTCTTACAAAGTGATCAAAGTTGAGCCTTTC  
AACTCCACAAAGAAGCGAATGGGAGTTGTAATCGAGCTTCTGAGGGAGGACGTATGCGTGCTCACACGAAAGGA  
GCTTCCGAGATTGTTTTAGCTGCTTGTGACAAAGTTGTAACCTCGAGCGGTGAGGTTGTTCCACTTGATGAAGAA  
TCAATCAAGTATCTGAATGTTACAATCAACGAGTTTGGCTAATGAAGCTCTTCAACTCTTTCGCTTGTCTTATATG  
GATATTGAAGGCGGGTTTTCGCCGGATGATGCAATCCCGCTTCTGGATTACTTGCCTAGGGATTGTGGGAATC  
AAAGATCCCGTACGTCTGGAGTTAAAGAATCTGTTGAGCTTTGTGCGCGTGCTGGAATCACTGTGAGGATGGTT  
ACAGGAGATAACATTAACACCGCGAAAGCAATTGCTAGAGAATGTGGGATTTTAACTGATGACGGTATAGCCATC  
GAAGGTCCCGTATTACAGAGAGAAGAATCAAGAAGAGTTACTAGAAGTATTCCAAGATTCAGGTGATGGCTCGT  
TCTTACCAATGGATAAGCATAACACTTGTGAAACAGTTAAGGACAACGTTTGTGATGAAGTTGTTGCTGTCACTGGA  
GATGGAACAAATGATGCACCTGCACCTTCAATGAAGCTGATATTGGACTAGCAATGGGAATTGCTGGAACCTGAAGTG  
GCGAAAGAGAGCGCTGATGTCATCATTCTCGACGATAACTCAGCACGATCGTCACAGTTGCTAAATGGGGACGT  
TCTGTTTACATAAACATCCAGAAATTCGTTTCAAGTTTACCGTTAATGTTGTTGCACCTGGTTGTTAAGTTTCT  
TCTTCAAGTTGTTAACCAGGAGTGTCTTAACTGCTGTTCAATTGTTGTTGGGTAACATGATCATGGACACA  
CTTGGAGCTCTTGTCTTAGCTACAGAGCCACCAACGACGAGCTGATGAAGCGTTTACCTGTTGGAAGGAGAGGC  
AATTTCACTACTAATGCGATGTGGAGGAACATTTAGGACAAGCTGTTTACCAATTCATCGTAATTTGGATTCTC  
CAAGCCAAAGGGAAGGCTATGTTTGGTCTCGACGGTCTGACTCAACTCTCATGTTAAACACTCTTATCTTCAAC  
TGCTTCTGCTTCTGTGAGGTTTAAACGAGATAAGCTCGCGAGAGATGGAAGAGATCGATGTTTTCAAAGGAATA  
CTGGACAATTACGTCTTGTGGTGTGATCGGTGCAACGGTTTTCTTTCAGATCATAATCATCGAGTTCTTGGGC  
ACATTTGCAAGCACAAACCACTCACATAACACAATGGATCTTCAAGTATCTTCAAGGTTTCTTGGGTATGCCA  
ATCGCCGCTGGACTGAAGACGATTCCGGAAGGCGGTGGACTAGTGATGGTGGAGCAAGGGCGAGGAGCTTTTCACT  
GGAGTTGTCCCAATCTTGTGTAATTAGATGGTGTGTTAATGGGCACAAATTTTCTGTGAGTGGAGAGGGTGAA  
GGTGTGCAACATACGGAAAACCTTACCCTTAAATTTATTTGCACTACTGGAAAACCTACCTGTTCCATGGCCAACC  
CTGGTCAACCCTTCCGGCTACGGCGTGCAGTGCTTCCGCGGTTATCCGGACCATATGAAGCGGCACGACTTCTTC  
AAGAGCGCCATGCCTGAGGGATACGTGCAGGAGAGGACCATCTTCTTCAAGGACGACGGGAACATAAGACACGT  
GCTGAAGTCAAGTTTGGAGGAGACACCTCGTCAACAGGATCGAGCTTAAAGGAATCGATTTCAAGGAGGACGGA

AACATCCTCGGCCACAAGTTAGAATACAAC TACAAC TCCACAACGTATACATCATGGCCGACAAGCAAAAGAAC  
GGCATCAAAGCCAAC TCAAGACCCGCCACAACATCGAAGACGGCGGGCTGCAACTCGCTGATCATTATCAACAA  
AATACTCCAATTGGCGATGGCCCTGTCTTTTACCAGACAACCATTACCTGTCTGACCAGTCCGCCCTTTGAAA  
GATCCCAACGAAAAGAGAGACCACATGGTCCTTCTTGAGTTTGTAAACAGCTGCTGGGATTACACATGGCATGGAT  
GAACTATACAAGGC TCTAGACCCGGGAATGCATCACCATCACCATCACGGATCCGATTATGATATTCCAAC TACT  
GCTAGTGAGAATTTGTATTTTCAGGGTGAAC TGA AAAACCGCGGCTCTTGCGCAACACGATGAAGCCGTGGACAAC  
AAATTCAACAAAGAACAACAAAACGCGTTC TATGAGATCTTACATTTACCTAACTTAAACGAAGAACAACGAAAC  
GCCTTCATCCAAAGTTTAAAAGATGACCCAAGCCAAAGCGCTAACCTTTTAGCAGAAGCTAAAAGCTAAATGAT  
GCTCAGGCGCCGAAAGTAGACAACAAATTCAACAAAGAACAACAAAACGCGTTC TATGAGATCTTACATTTACCT  
AACTTAAACGAAGAACAACGAAACGCCTTCATCCAAAGTTTAAAAGATGACCCAAGCCAAAGCGCTAACCTTTTA  
GCAGAAGCTAAAAGCTAAATGGTGCTCAGGCGCCGAAAGTAGACGCGAATTCCGCGGGGAAGTCAACCTGAG  
CTCGAATTTCCCGATCGTTCAAACATTTGGCAATAAAGTTTCTTAAGATTGAATCCTGTGCGCGTCTTGCAT  
GATTATCATATAATTTCTGTGTAATTACGTTAAGCATGTAATAATTAACATGTAATGCATGACGTTATTTATGAG  
ATGGGTTTTTATGATTAGAGTCCC GCAATTATACATTTAATACGCGATAGAAAACAAAATATAGCGCGCAACTA  
GGATAAATTATCGCGCGCGGTGTCATCTATGTTACTAGATCGGGAATTCAGCTTTTGTTCCTTTAGTGAGGGTT  
AATTCGAGCTTGCGTAATCATGGTCATAGCTGTTTCTGTGTGAAATTGTTATCCGCTCACAATTCCACACAA  
CATACGAGCCGGAAGHCATAAAGTGTAAGCCTGGGGTGCC TAATGAGTGAGCTAACTCACATTAATTGCGTTGC  
GCTCACTGCCCGCTTTCCAGTCGGGAAACCTGTCGTGCCAGCTGCATTAATGAATCGGCCAACGCGCGGGGAGAG  
GCGGTTTTGCGTATTGGGCGCTCTTCCGCTTCCCTCGCTCACTGACTCGCTGCGCTCGGTTCGCTCGGGCGAG  
CGGTATCAGCTCACTCAAAGGCGGTAATACGGTTATCCACAGAATCAGGGGATAACGCAGGAAAGAACATGAAGG  
CCTTGACAGGATATATTGGCGGGTAAACTAAGTCGCTGTATGTGTTTGTGAGATCTCATGTGAGCAAAAAGGCC  
AGCAAAAAGGCCAGGAACCGTAAAAGGCCGCGTTGCTGGCGTTTTTCCATAGGCTCCGCCCCCTGACGAGCATC  
ACAAAATCGACGCTCAAGTCAGAGGTGGCGAAACCCGACAGGACTATAAAGATACCAGGCGTTTTCCCTGGAA  
GCTCCCTCGTGCGCTCTCCTGTTCCGACCTGCCGCTTACCGGATACCTGTCCGCCTTTCTCCCTTCGGGAAGCG  
TGGCGCTTTCTCATAGCTCACGCTGTAGGTATCTCAGTTCGGTGTAGGTCGTTCCGCTCCAAGCTGGGCTGTGTGC  
ACGAACCCCGTT CAGCCGACCGCTGCGCCTTATCCGGTAAC TATCGTCTTGAGTCCAACCCGGTAAGACACG  
ACTTATCGCCACTGGCAGCAGCCACTGGTAACAGGATTAGCAGAGCGAGGTATGTAGGCGGTGCTACAGAGTTCT  
TGAAGTGGTGGCCTAACTACGGCTACACTAGAAGAACAGTATTTGGTATCTGCGCTCTGCTGAAGCCAGTTACCT  
TCGGAAGAAGAGTTGGTAGCTCTTGATCCGGCAAACAAACCACCGCTGGTAGCGGTGGTTTTTTTTGTTTGCAAGC  
AGCAGATTACGCGCAGAAAAAAGGATCTCAAGAAGATCCTTTGATCTTTTCTACGGGGTCTGACGCTCAGTGGA  
ACGAAAAC TACGTTAAGGGATTTTTGGTCA TGAGATTATCAAAAAGGATCTTCACCTAGATCCTTTTAAAT TAAA  
AATGAAGTTTTAAATCAATCTAAAGTATATATGTGTAACATGGTCTAGTGATTAGAAAAACTCATCGAGCATCA  
AATGAAACTGCAATTTATTCATATCAGGATTATCAATACCATATTTTTGAAAAAGCCGTTTCTGTAATGAAGGAG  
AAAAC TACCCGAGGCAGTTCCATAGGATGGCAAGATCCTGGTATCGGTCTGCGATTCCGACTCGTCCAACATCAA  
TACAACCTATTAATTTCCCTCGTCAAAAATAAGGTTATCAAGTGAGAAATCACCATGAGTGACGACTGAATCCG  
GTGAGAATGGCAAAGTTTTATGCATTTCTTTCCAGACTTGTTCAACAGGCCAGCCATTACGCTCGTCATCAAAT  
CACTCGCATCAACCAAACCGTTATT CATTTCGTGATTGCGCCTGAGCGAGACGAAATACGCGATCGCTGTTAAAAG  
GACAATTACAAACAGGAATCGAATGCAACCGGCGCAGGAACACTGCCAGCGCATCAACAATATTTTACCTGAAT  
CAGGATATTCTTCTAATACCTGGAATGCTGTTTTCCCTGGGATCGCAGTGGTGAGTAACCATGCATCATCAGGAG  
TACGGATAAAAATGCTTGATGGTTCGGAAGAGGCATAAATTCCGTCAGCCAGTTTAGTCTGACCATCTCATCTGTAA  
CAACATTGGCAACGCTACCTTTGCCATGTTTCAGAAACAAC TCTGGCGCATCGGGCTTCCCATACAATCGGTAGA  
TTGTGCGACCTGATTGCCCGACATTATCGCGAGCCATTTATACCATATAAATCAGCATCCATGTTGGAATTTA  
ATCGCGGCTTGAGCAAGACGTTTCCCGTTGAATATGGCTCATAACACCCCTTGTAATTACTGTTTATGTAAGCAG  
ACAGTTTTATGTTTATGATGATATATTTTTATCTTGTGCAATGTAACATCAGAGATTTTGAGACACAACGTGGC  
TTTGTGTAATAAATCGAACTTTTGCTGAGTTGAAGGATCAGATCACGCATCTTCCCGACAACGCAGACCGTTCCG  
TGGCAAAGCAAAAGTTCAAAATCACCAACTGGTCCACCTACAACAAAGCTCTCATCAACCGTGGCTCCCTCACT  
CTGGCTGGATGATGGGGCGATT CAGGCGATCCCCATCCAACAGCCCGCGTTCGAGCGGGCT

**Plasmid Stock pYES2 *ACA12*, *GAL1::ACA12*.** The *ACA12* coding sequence (blue italics) was cloned into the pYES2 vector downstream a unique KpnI restriction site; *ACA12* begins with the sequence *ATGAGGGACCTC* and ends with the sequence *CTCAAGAAACCT*. Downstream is a *GGTCTAGAGGGCCGCATCATGTAA* sequence containing pYES2 polilinker terminator and stop codon (highlighted in red). The yeast expression pYES2 vector harbors: *GAL1* promoter for galactose-inducible protein expression in yeast, *ura3* gene for selection in yeast by uracil prototrophy and ampicillin resistance marker for selection in bacteria.

```
ACGGATTAGAAGCCGCGGAGCGGGTGACAGCCCTCCGAAGGAAGACTCTCCTCCGTGCGTCTTCGTCTTCACCGG
TCGCGTTTCTGAAACGCAGATGTGCCTCGCGCCGACTGCTCCGAACAATAAAGATTCTACAATACTAGCTTTTA
TGGTTATGAAGAGGAAAAATTGGCAGTAACCTGGCCCCACAAACCTTCAAATGAACGAATCAAATTAACAACCAT
AGGATGATAATGCGATTAGTTTTTTAGCCTTATTTCTGGGGTAATTAATCAGCGAAGCGATGATTTTTGATCTAT
TAACAGATATATAAATGCAAAAAGTGCATAACCACTTTAACTAATACTTTCAACATTTTTCGGTTTGTATTACTTC
TTATTCAAATGTAATAAAAAGTATCAACAAAAAATTGTTAATATACTCTATACTTTAACGTCAAGGAGAAAAAAC
CCCGGATCGGACTACTAGCAGCTGTAATACGACTCACTATAGGGAATATTAAGCTTGGTACCATGAGGGACCTCA
AGGAATATGATTACAGTGCACTTTTGCTCAACCTTACCACCTCCAGCCTCAACAAGGCCAGAGGCGTTGGCGTT
TTGCCTACGCTGCCATCTACTCTATGAGGGCTATGCTCTCTCTTGTAAAGGAGATAGTTCCCGCAAGGATTGATC
CCAAAACCTCAGATGCCTCTCTCTCTCTCTCTACACAGCCCTCGAGTCCGGTGAGGGAGCAAAGATCAACTCTA
TGCCTCTCTCTTACGTTCTGCCATTGATCAAGAACAACCTGTGGAGATCATGAAGGGTAAGGACTTACCGGGCA
TCCAAGCGCTGGGCGGCGTGGAGGGTGTGCGCGCTTCCCTTAGGACTAACCCACCAAAGGGATCCACGGGAATG
AGCAAGAAGTCAGTAGACGCCGTGACCTCTTGGCTCTAACACCTACCATAAGCCACCGCTAAAGGACTTCTCT
TCTTTGTGTATGAAGCTTCAAAGACCTAACCATCTTGATCTTGTGGTCTGCGCTATTTTTCTCCCTTGGCTTCG
GTATCAAAGAACATGGCATCAAAGAAGGTTGGTATGAAGGCGGAAGCATCTTGTAGCAGTCTTCTGGTCATAG
TTGTCTCTGCTCTCAGCAACTTTAGGCAGGAGAGACAGTTCGACAAGCTGTCCAAGATAAGCAATAACATCAAAG
TGGAAGTCTTCGGGACAGCAGGCGGCAACATATCTCCATCTTTGACGTTGTTGTTGGTGTATGTTGTCTTCTTGA
AGATCGGAGATCAGATTCCCGCTGATGGTCTGTTCTTGGAAAGGCATTCACTTCAGGTGGACGAGTCTAGTATGA
CAGGAGAGAGTGACCATCTTGAAGTGACCACAAGGATAATCCCTTCTTGTTCAGGGACAAAGATAGTCGATG
GGTTTGCTCAAATGCTCGTTGTCTCTGTGGGTATGAGTACAACCTGGGGACAGACGATGAGCTCCATAAAATCAAG
ATTCCAGCGAGAGAACACCTTTGCAAGTCCGTCTTGACACGCTGACCTCCACCATCGGAAAAATTGGTCTTACGG
TGGCAGCACTTGTTCGGTAGTTCTATTAGTCCGTTACTTCACTGGGAACACAGAGAAAAGAGGGGAAAAAGAGAAT
ACAACGGGAGCAAAAACCTGTGGACACTGTGGTCAATTCCGTTGTGCGAATCGTGGCAGCTGCAGTAACCATTG
TCGTAGTAGCTATCCAGAAGGCTTGCCATTGGCTGTGACTCTGACGCTGGCTTACTCCATGAAGAGAATGATGT
CTGATCAAAGCTATGGTCAGAAAGCTCTCGGCATGCAGACGATGGGCTCAGCGACAGTGATATGCACAGACAAA
CAGGTACTTTAACTGAAACGAGATGAAGGTTACCAAGTTTTGGCTTGGCCAAGAGTCAATCCATGAAGACTCTA
CCAAAATGATCTCACCAGACGTTCTTGATCTGCTTTACCAAGGCACCGGTCTGAACACAACGGGAAGTGTCTGTG
TGTCAGACTCAGGATCAACGCCTGAGTTCTCAGGCAGTCCAACAGAGAAGGCCCTCTTGTCTTGGACTGTGCTAA
ATCTGGGTATGGATATGGAGTCAGTAAAGCAGAAACATGAAGTTCTCCGCTTGAACCTTTCAGTTCAGCAAAGA
AAAGAAGCGGAGTTTTTGGTCCGAAGAAAATCTGACAATACAGTCCATGTACACTGGAAAGGAGCCGCTGAAATGG
TCCTAGCTATGTGTTCTCACTACTACACAAGCACTGGGTCTGTTGACTTAATGGACTCCACCAGCAAGAGCAGAA
TTCAGGCAATAATCCAAGGTATGGCGGCCAGTAGCCTCAGATGCATAGCATTTCGCTCATAAAAATAGCGTCAAATG
ACTCGGTATTAGAGGAAGATGGCTTGACCTTGATGGGAATAGTGGGTCTGAAAGATCCTTGTGACCTGGTGTCT
CAAAAGCTGTGGAAACTTGCAAACCTTGACAGGAGTACCATTAAAGATGATAACGGGAGATAATGTTTTCACTGCAA
AAGCTATCGTTTTTGAATGCGGAATCCTCGACCACAATGACAAAGATGAAGAAGATGCTGTTGTAGAAGGTGTTT
AATTCAGAAATTATACGGACGAAGAGAGAATGCAGAAAGTTGATAAGATCCGGGTCATGGCAAGGTCTCTCCCT
CCGACAAGCTTCTAATGGTCAAGTGTCTGAGACTTAAAGGCCATGTGGTAGCCGTCACAGGGGATGGCACCACG
ATGCACCTGCATAAAAGAAGCAGATATTGGACTCTCTATGGGAATTCAGGGCACTGAAGTGGCAAAAAGAAAGCT
CAGACATTGTAATTCTAGATGATAACTTCGCATCCGTTGCCACAGTCTTAAAATGGGGAAGGTGTGTCTACAACA
ATATCCAGAAATTCATTAGTTTTCAGCTAACAGTGAACGTTGCAGCTCTTGTGATCAATTTTATCGCAGCAATTT
CAGCCGGTGAGGTCCCTTTGACAGCAGTTCAACTGCTGTGGGTAAACCTCATCATGGACACATTGGGAGCTCTGG
CTCTCGCCACGGAGCGACCCACTAACGAGCTCCTGAAGAGAAAGCCAGTTGGCCGAACAGAGGGCCCTGATAACAA
ATGTCATGTGGAGGAATCTCTGGTTCAGTCATTATATCAAATAGCCGTACTCTTGTATCTTACAATTCAAGGGTA
TGTCAATATTCAGTGTTCGCAAGGAAGTGAAGGACACGCTCATATTCAACACTTTCGTGCTCTGTCAAGTTTTTA
ACGAATTCATGCGAGGGAGATGGAGAAGAAAAATGTGTTCAAAGGCCCTCACAGAAACAGGTTGTTTCATTGGAA
```

TAATAGCGATAACTATTGTGCTTCAAGTCATTATGGTGGAAATCCTAAAGAAGTTTGCGGATACAGTAAGGCTTA  
ACGGGTGGCAATGGGGAACCTGCATAGCACTTGCATCCCTTTCATGGCCGATCGGCTTTTTTCACAAAATTCATAC  
CTGTTTCTGAGACACCATTCCCTCAGTTACTTTAAGAATCCAAGATCCTTATTTAAGGGTTCAAGAAGCCCATCTC  
TCAAGAAACCTGGACTAGAGGGCCGCATCATGTAATTAGTTATGTCACGCTTACATTACAGCCCTCCCCCACAT  
CCGCTCTAACCAGAAAAGGAAGGAGTTAGACAACCTGAAGTCTAGGTCCCTATTTATTTTTTTATAGTTATGTTAG  
TATTAAGAACGTTATTTATATTTCAAATTTTTCTTTTTTTCTGTACAGACGCGTGTACGCATGTAACATTATAC  
TGAAAACCTTGCTTGAGAAGGTTTTGGGACGCTCGAAGGCTTTAATTTGCGGCCCTGCATTAATGAATCGGCCAA  
CGCGCGGGGAGAGGCGGTTTGGCGTATTGGGCGCTCTTCCGCTTCCCTCGCTCACTGACTCGCTGCGCTCGGTGCGT  
CGGCTGCGGGAGCGGTATCAGCTCACTCAAAGGCGGTAATACGGTTATCCACAGAATCAGGGGATAACGCAGGA  
AAGAACATGTGAGCAAAAGGCCAGCAAAAGCCCAGGAACCGTAAAAAGGCCGCGTTGCTGGCGTTTTTCCATAGG  
CTCCGCCCCCTGACGAGCATCACAAAATCGACGCTCAAGTCAGAGGTGGCGAAACCCGACAGGACTATAAAGA  
TACCAGGCGTTTTCCCTGGAAGCTCCCTCGTGCCTCTCTGTTCCGACCCGCGCTTACCGGATACCTGTCC  
GCCTTTCTCCCTTCGGGAAGCGTGGCGCTTCTCATAGCTCACGCTGTAGGTATCTCAGTTCGGTGTAGGTGCGT  
CGCTCCAAGCTGGGCTGTGTGCACGAACCCCCGTTTCCAGCCGACCGCTGCGCCTTATCCGGTAACATCGTCTT  
GAGTCCAACCCGGTAAGACACGACTTATCGCCACTGGCAGCAGCCACTGGTAACAGGATTAGCAGAGCGAGGTAT  
GTAGGCGGTGCTACAGAGTTCTTGAAGTGGTGGCCTAACTACGGCTACACTAGAAGGACAGTATTTGGTATCTGC  
GCTCTGCTGAAGCCAGTTACCTTCGGAAGGAGTTGGTAGCTCTTGATCCGGCAAAACAAACCACCGCTGGTAGC  
GGTGGTTTTTTTTGTTTTGCAAGCAGCAGATTACGCGCAGAAAAAAGGATCTCAAGAAGATCCTTTGATCTTTTCT  
ACGGGGTCTGACGCTCAGTGAACGAAAACCTCACGTTAAGGGATTTTTGGTTCATGAGATTATCAAAAAGGATCTTC  
ACCTAGATCCTTTTAAATTAATAAATGAAGTTTTAAATCAATCTAAAGTATATATGAGTAAACTTGGTCTGACAGT  
TACCAATGCTTAATCAGTGAGGCACCTATCTCAGCGATCTGTCTATTTTCGTTTCCATAGTTGCCTGACTCCCC  
GTCGTGTAGATAACTACGATACGGGAGCGCTTACCATCTGGCCCCAGTGTGCAATGATACCGCGAGACCCACGC  
TCACCGGCTCCAGATTTATCAGCAATAAACAGCCAGCCGGAAGGGCCGAGCGCAGAAGTGGTCTGCAACTTTA  
TCCGCTCCATTCAGTCTATTAATTGTTGCCGGGAAGCTAGAGTAAGTAGTTCGCCAGTTAATAGTTTTGCGCAAC  
GTTGTTGGCATTGCTACAGGCATCGTGGTGTCACTCTCGTCGTTTTGGTATGGCTTCATTCAGTCCGGTTCCCAA  
CGATCAAGGCGAGTTACATGATCCCCATGTTGTGCAAAAAGCGGTTAGCTCCTTCGGTCCCTCCGATCGTTGTC  
AGAAGTAAGTTGGCCGAGTGTATCACTCATGGTTATGGCAGCACTGCATAAATCTCTTACTGTCATGCCATCC  
GTAAGATGCTTTTCTGTGACTGGTGAAGTACTCAACCAAGTCATTCTGAGAATAGTGTATGCGGCGACCGAGTTGC  
TCTTGCCCGGCGTCAATACGGGATAATAGTGTATCACATAGCAGAACTTTAAAAGTGCTCATCATTGGAAAACGT  
TCTTCGGGGCGAAAACCTCTCAAGGATCTTACCCTGTTGAGATCCAGTTTCGATGTAACCCACTCGTGCACCCAAC  
TGATCTTCAGCATCTTTTACTTTTACCAGCGTTTTCTGGGTGAGCAAAAACAGGAAGGCAAAATGCCGCAAAAAG  
GGAATAAGGGCGACACGGAAATGTTGAATACTCATACTCTTCTTTTTTCAATGGGTAATAACTGATATAAATAAA  
TTGAAGCTCTAATTTGTGAGTTTAGTATACATGCATTTACTTATAATACAGTTTTTTTAGTTTTGCTGGCCGCATC  
TTCTCAAATATGCTTCCAGCCTGCTTTTCTGTAACGTTACCCTCTACCTTAGCATCCCTTCCCTTTGCAAATA  
GTCTCTTCCAACAATAAATAATGTGAGATCCTGTAGAGACCACATCATCCACGGTTCTATACTGTTGACCCAATG  
CGTCTCCCTTGTATCTAAACCCACACCGGGTGTGATAATCAACCAATCGTAACCTTCATCTCTTCCACCCATGT  
CTTTTTGAGCAATAAAGCCGATAACAAAATCTTTGTGCTCTTTCGCAATGTCAACAGTACCCTTAGTATATTTCTC  
CAGTAGATAGGGAGCCCTTGCATGACAATTTGCTAACATCAAAGGCCCTTAGGTTCCCTTGTACTTCTTCTG  
CCGCTGCTTCAAACCGCTAACAAATACCTGGGCCACACACCGTGTGCATTCGTAATGTCTGCCATTCTGCTA  
TTCTGTATACACCCGAGAGTACTGCAATTTGACTGTATTACCAATGTCAGCAAATTTTCTGTCTTCGAAGAGTA  
AAAAATTTGACTTGGCGGATAATGCCCTTTAGCGGCTTAACTGTGCCCTCCATGGAAAAATCAGTCAAGATATCCA  
CATGTGTTTTTAGTAAACAAAATTTGGGACCTAATGCTTCAACTAACTCCAGTAATTCCTTGGTGGTACGAACAT  
CCAATGAAGCACACAAGTTTGTGTTTTCTGTCATGATATTAATAGCTTGGCAGCAACAGGACTAGGATGAG  
TAGCAGCACGTTCTTATATGTAGCTTTTCGACATGATTTATCTTCGTTTTCTGCAGGTTTTTGTCTGTGCAGTT  
GGTTAAGAATACTGGGCAATTTTCATGTTTTCTTCAACTACATATGCGTATATATACCAATCTAAGTCTGTGCT  
CCTTCTTCGTTCTTCTTCTGTTTCGGAGATTACCGAATCAAAAAAATTTCAAAGAAACCGAAATCAAAAAAAG  
AATAAAAAAATGATGAATTGAATTGAAAAGCTAGCTTATCGATGATAAGCTGTCAAAGATGAGAATTAATTC  
CACGGACTATAGACTATACTAGATACTCCGCTACTGTACGATACACTTCCGCTCAGGTCTTGTCTTTAACGA  
GGCCTTACCCTCTTTTGTACTCTATTGATCCAGCTCAGCAAAGGCAGTGTGATCTAAGATTTCTATCTTCGCGA  
TGTAAGTAAACTAGCTAGACCGAGAAAGAGACTAGAAATGCAAAGGCACTTCTACAATGGCTGCCATCATTATT  
ATCCGATGTGACGCTGCAGCTTCTCAATGATATTGCAATACGTTTTGAGGAGATACAGCCTAATATCCGACAAAC  
TGTTTTACAGATTTACGATCGTACTTGTACCATCATTGAATTTTGAACATCCGAACCTGGGAGTTTTCCCTGA  
AACAGATAGTATATTTGAACCTGTATAAATAATATATAGTCTAGCGCTTACGGAAGACAATGTATGTATTTCCGGT  
TCCTGGAGAACTATTGCATCTATTGCATAGGTAATCTTGCACGTCGCATCCCCGGTTCATTTTCTGCGTTTCCA

TCTTGCACTTCAATAGCATATCTTTGTTAACGAAGCATCTGTGCTTCATTTTGTAGAACAAAAATGCAACGCGAG  
AGCGCTAATTTTTCAAACAAAGAATCTGAGCTGCATTTTTACAGAACAGAAATGCAACGCGAAAGCGCTATTTTA  
CCAACGAAGAATCTGTGCTTCATTTTTGTAAAACAAAAATGCAACGCGACGAGAGCGCTAATTTTTCAAACAAAG  
AATCTGAGCTGCATTTTTACAGAACAGAAATGCAACGCGAGAGCGCTATTTTACCAACAAAGAATCTATACTTCT  
TTTTTGTCTACAAAAATGCATCCCGAGAGCGCTATTTTTCTAACAAAGCATCTTAGATTACTTTTTTTCTCCTT  
TGTGCGCTCTATAATGCAGTCTCTTGATAACTTTTTGCACTGTAGGTCCGTTAAGGTTAGAAGAAGGCTACTTTG  
GTGTCTATTTTCTCTTCCATAAAAAAAGCCTGACTCCACTTCCCGCGTTTACTGATTACTAGCGAAGCTGCGGGT  
GCATTTTTTCAAGATAAAGGCATCCCGATTATATTCTATAACCGATGTGGATTGCGCATACTTTGTGAACAGAAA  
GTGATAGCGTTGATGATTCTTCATTGGTCAGAAAATTATGAACGGTTTCTTCTATTTTGTCTCTATATACTACGT  
ATAGGAAATGTTTACATTTTCGTATTGTTTTCGATTCACTCTATGAATAGTTCTTACTACAATTTTTTTTGTCTAA  
AGAGTAATACTAGAGATAAACATAAAAAATGTAGAGGTCGAGTTTAGATGCAAGTTCAAGGAGCGAAAGGTGGAT  
GGGTAGGTTATATAGGGATATAGCACAGAGATATATAGCAAAGAGATACTTTTGAGCAATGTTTGTGGAAGCGGT  
ATTCGCAATGGGAAGCTCCACCCCGTTGATAATCAGAAAAGCCCCAAAAACAGGAAGATTGTATAAGCAAATAT  
TTAAATTGTAAACGTTAATATTTTGTAAAAATTCGCGTTAAATTTTTTGTAAATCAGCTCATTTTTTTAACGAATA  
GCCCCAAATCGGCAAAATCCCTTATAAATCAAAGAATAGACCGAGATAGGGTTGAGTGTGTTCCAGTTTCCAA  
CAAGAGTCCACTATTAAAGAACGTGGACTCCAACGTCAAAGGGCGAAAAAGGGTCTATCAGGGCGATGGCCCACT  
ACGTGAACCATCACCCATAATCAAGTTTTTTGGGGTTCGAGGTGCCGTAAGCAGTAAATCGGAAGGGTAAACGGAT  
GCCCCATTTAGAGCTTGACGGGGAAAGCCGGCGAACGTGGCGAGAAAGGAAGGGAAGAAAGCGAAAGGAGCGGG  
GGCTAGGGCGGTGGGAAGTGTAGGGGTCACGCTGGGCGTAACCACCACACCCGCCGCTTAATGGGGCGCTACA  
GGGCGCGTGGGGATGATCCACTAGT

**Plasmid Stock pYES2 *ACA12-GFP*, *GAL1::ACA12-GFP*.** The *ACA12* coding sequence (blue italics) was cloned into the pYES2 vector downstream a unique KpnI restriction site; *ACA12* begins with the sequence *ATGAGGGACCTC* and ends with the sequence *CTCAAGAAACCT*. Immediately downstream is a GFP coding sequence (green italics) starting with the sequence *ATGGTGAGCAAG* and ending with the sequence *CATCACCATCACCATCACGGATCC***TGA**, encoding a 6xHis tag followed by a stop codon (highlighted in red). Single N211D and R334E mutants and the N211D-R334E double mutant were produced by site-directed mutagenesis using pYES2 *ACA12-GFP* construct as a template. Bases highlighted in yellow are those modified for generating the specified mutations. The yeast expression pYES2 vector harbors: *GAL1* promoter for galactose-inducible protein expression in yeast, *ura3* gene for selection in yeast by uracil prototrophy and ampicillin resistance marker for selection in bacteria.

ACGGATTAGAAGCCGCGGAGCGGGTGACAGCCCTCCGAAGGAAGACTCTCCTCCGTGCGTCCTCGTCTTCACCGG  
TCGCGTTTCTGAAACGCAGATGTGCCTCGCGCCGCACTGCTCCGAACAATAAAGATTCTACAATACTAGCTTTTA  
TGGTTATGAAGAGGAAAAATTGGCAGTAACCTGGCCCCACAAACCTTCAAATGAACGAATCAAATTAACAACCAT  
AGGATGATAATGCGATTAGTTTTTTAGCCTTATTTCTGGGGTAATTAATCAGCGAAGCGATGATTTTTGATCTAT  
TAACAGATATAAATGCAAAAACCTGCATAACCACTTTAACTAATACTTTCAACATTTTCGGTTTTGTATTACTTC  
TTATTCAAATGTAATAAAAGTATCAACAAAAAATTGTTAATATACCTCTATACTTTAACGTCAAGGAGAAAAAC  
CCCGGATCGGACTACTAGCAGCTGTAATACGACTCACTATAGGGAATATTAAGCTTGGTACC*ATGAGGGACCTCA*  
*AGGAATATGATTACAGTGCACTTTTGCTCAACCTTACCACCTCCAGCCTCAACAAGGCCAGAGGCGTTGGCGTT*  
*TTGCCTACGCTGCCATCTACTCTATGAGGGCTATGCTCTCTCTTGTAAAGGAGATAGTTCCCGCAAGGATTGATC*  
*CCAAAACCTCAGATGCCTCTCTCTCTCTCTCTTACACAGCCCTCGAGTCCGGTGAGGGAGCAAAGATCAACTCTA*  
*TGCCTCTCTCTTACGTTCTGCCATTGATCAAGAACAACCTGTGGAGATCATGAAGGGTAAGGACTTACC*  
*TCCAAGCGCTGGGCGGCGTGGAGGGTGTGCGCCGTTCCCTTAGGACTAACCCACCAAAGGGATCCACGGGAATG*  
*AGCAAGAAGTCAGTAGACGCCGTGACCTCTTTGGCTCTAACACCTACCATAAGCCACCGCTAAAGGACTTCTCT*  
*TCTTTGTGTATGAAGCTTTCAAAGACCTAACCATCTTGATCTTGTGGTCTGCGCTATTTTCTCCCTTGGCTTCG*  
*GTATCAAAGAACATGGCATCAAAGAAGGTTGGTATGAAGGCGGAAGCATCTTTGTAGCAGTCTTCTTGGTCATAG*  
*TTGTCTCTGCTCTCAGCAACTTTAGGCAGGAGAGACAGTTCGACAAGCTGTCCAAGATAAGCAATAACATCAAAG*  
*TGGAAGTCTTCGGGACAGCAGGCGGCAACATATCTCCATCTTTGACGTTGTTGTTGGTGTATGTTGCTTCTTGA*  
*AGATCGGAGATCAGATTCCCGCTGATGGTCTGTTCTTGGAAAGGCATTCACTTCAGGTGGACGAGTCTAGTATGA*  
*CAGGAGAGAGTGACCATCTTGAAGTGACCACAAGGATAATCCCTTCTTGTCTCAGGGACAAAGATAGTTCGATG*  
*GGTTTGCTCAAATGCTCGTTGTCTCTGTGGGTATGAGTACAACCTGGGGACAGACGATGAGCTCCATAAATCAAG*  
*ATTCCAGCGAGAGAACACCTTTGCAAGTCCGTCTTGACACGCTGACCTCCACCATCGGAAAAATTGGTCTTACGG*  
*TGGCAGCACTTGTCTGGTAGTTCTATTAGTCCGTTACTTCACTGGGAACACAGAGAAAGAGGGCAAAGAGAAT*  
*ACAACGGGAGCAAACACCTGTGGACACTGTGGTCAATTCCGTTGTGCGAATCGTGGCAGCTGCAGTAACCATTG*  
*TCGTAGTAGCTATCCAGAAGGCTTGCCATTGGCTGTGACTCTGACGCTGGCTTACTCCATGAAGAGAATGATGT*  
*CTGATCAAGCTATGGTCAGAAAGCTCTCGGCATGCGAGACGATGGGCTCAGCGACAGTGATATGCACAGACAAA*  
*CAGGTACTTTAACTGAACGAGATGAAGGTTACCAAGTTTTGGCTTGGCCAAGAGTCAATCCATGAAGACTCTA*  
*CCAAAATGATCTCACCAGACGTTCTTGATCTGCTTTACCAAGGCACCGGTCTGAACACAACGGGAAGTGTCTGTG*  
*TGTCAGACTCAGGATCAACGCCTGAGTTCTCAGGCAGTCCAACAGAGAAGGCCCTCTTGTCTTGGACTGTGCTAA*  
*ATCTGGGTATGGATATGGAGTCAGTAAAGCAGAAACATGAAGTTCTCCGCGTTGAAACTTTCAGTTCAGCAAAGA*  
*AAAGAAGCGGAGTTTTGGTCCGAAGAAAATCTGACAATACAGTCCATGTACACTGGAAAGGAGCCGCTGAAATGG*  
*TCCTAGCTATGTGTTCTCACTACTACACAAGCACTGGGTCTGTTGACTTAATGGACTCCACC*  
*GCAAAGAGCAGAAATTCAGGCAATAATCCAAGGTATGGCGCCAGTAGCCTCAGATGCATAGCATTCGCTCATAAAATAGCGTCAAATG*  
*ACTCGGTATTAGAGGAAGATGGCTTGACCTTGATGGGAATAGTGGGTCTGAAAGATCCTTGTGACCTGGTGTCT*  
*CAAAGCTGTGGAAACTTGCAAACCTGCAGGAGTCAACATTAAGATGATAACGGGAGATAATGTTTTCACTGCAA*  
*AAGCTATCGCTTTTGAATGCGGAATCCTCGACCACAATGACAAAGATGAAGAAGATGCTGTTGTAGAAGGTGTTT*  
*AATTCAGAAATTATACGGACGAAGAGAGAATGCAGAAAGTTGATAAGATCCGGGTCAATGGCAAGGTCTCTCCCT*  
*CCGACAAGCTTCTAATGGTCAAGTGTCTGAGACTTAAAGGCCATGTGGTAGCCGTCACAGGGGATGGCACC*  
*AAACGATGCACCTGACTAAAAGAAGCAGATATTGGACTCTCTATGGGAATTCAGGGCACTGAAGTGGCAAAGAAAGCT*  
*CAGACATTGTAATTCTAGATGATAACTTCGCATCCGTTGCCACAGTCTTAAATGGGGAAGGTGTGTCTACAACA*  
*ATATCCAGAAATTCATTCAGTTTCACTAACAGTGAACGTTGCAGCTCTTGTGATCAATTTTATCGCAGCAATTT*  
*CAGCCGGTGAGTCCCTTTGACAGCAGTTCAACTGCTGTGGGTAAACCTCATCATGGACACATTGGGAGCTCTGG*

CTCTCGCCACGGAGCGACCCACTAACGAGCTCCTGAAGAGAAAGCCAGTTGGCCGAACAGAGGCCCTGATAACAA  
ATGTCATGTGGAGGAATCTCCTGGTTCAGTCATTATATCAAATAGCCGTACTCTTGATCTTACAATTCAAGGGTA  
TGTCAATATTCAGTGTTGCAAGGAAGTGAAGGACACGCTCATATTC AACACTTTTCGTGCTCTGTCAAGTTTTTA  
ACGAATTC AATGCGAGGGAGATGGAGAAGAAAAATGTGTTCAAAGGCCTTCACAGAAACAGGTTGTTCAATGGAA  
TAATAGCGATAACTATTGTGCTTCAAGTCATTATGGTGGAAATCCTAAAGAAGTTTGGGATACAGTAAGGCTTA  
ACGGGTGGCAATGGGGAACCTGCATAGCACTTGCATCCCTTTCATGGCCGATCGGCTTTTTACAAAATTCATAC  
CTGTTTCTGAGACACCATTCCCTCAGTTACTTTAAGAATCCAAGATCCTTATTTAAGGGTTCAAGAAGCCCATCTC  
TCAAGAAACCTGGACTAGTGATGGTGAGCAAGGGCGAGGAGCTGTTACCGGGGTGGTGCCCATCTGGTTCGAGC  
TGGACGGCGACGTAAACGGCCACAAGTTCAGCGTGTCCGGCGAGGGCGAGGGCGATGCCACCTACGGCAAGCTGA  
CCCTGAAGTTCATCTGCACCACCGCAAGCTGCCCGTGCCCTGGCCACCCTCGTGACCACCTTCACCTACGGCG  
TGCAGTGCTTCAGCCGCTACCCCGACCACATGAAGCAGCAGACTTCTTCAAGTCCGCCATGCCCGAAGGCTACG  
TCCAGGAGCGCACCATTCTTCAAGGACGACGGCAACTACAAGACCCGCGCCGAGGTGAAGTTCGAGGGCGACA  
CCCTGGTGAACCGCATCGAGCTGAAGGGCATCGACTTCAAGGAGGACGGCAACATCCTGGGGCACAAGCTGGAGT  
ACA ACTACAACAGCCACAACGTCTATATCATGGCCGACAAGCAGAAGAACGGCATCAAGGTGA ACTTCAAGATCC  
GCCACAACATCGAGGACGGCAGCGTGCAGCTCGCCGACCCTACCAGCAGAACACCCCATCGGCGACGGCCCCG  
TGCTGCTGCCCGACAACCACTACCTGAGCACCCAGTCCGCCCTGAGCAAAGACCCCAACGAGAAGCGCGATCACA  
TGGTCTCTGCTGGAGTTTCGTGACCGCCCGGGGATCACTCACGGCATGGACGAGCTGTACAAGGGTCTAGACCCGG  
GAATGCATCACCATCACCATCACGGATCCCGATTGATCGATAGAGCTCAGCTAGAGGGCCGCATCATGTAATTAG  
TTATGTCACGCTTACATTCACGCCCTCCCCACATCCGCTCTAACCGAAAAGGAAGGAGTTAGACAACCTGAAG  
TCTAGGTCCCTATTTATTTTTTTATAGTTATGTTAGTATTAAGAAGCTTATTTATATTTCAAATTTTTCTTTTTT  
TTCTGTACAGACGCGTGTACGCATGTAACATTATACTGAAAACCTTGCTTGAGAAGGTTTTGGGACGCTCGAAGG  
CTTTAATTTGCGGCCCTGCATTAATGAATCGGCCAACGCGCGGGGAGAGGCGGTTTTGCGTATTGGGCGCTCTTCC  
GTTCTCTCGCTCACTGACTCGCTGCGCTCGGTGCTTCGGCTGCGGCGAGCGGTATCAGCTCACTCAAAGGCGGTA  
ATACGGTTATCCACAGAATCAGGGGATAACGCAGGAAAGAACATGTGAGCAAAGGCCAGCAAAGGCCAGGAAC  
CGTAAAAAGGCCGCGTGTGCTGGCGTTTTTCCATAGGCTCCGCCCCCTGACGAGCATCACAAAAATCGACGCTCA  
AGTCAGAGGTGGCGAAACCCGACAGGACTATAAAGATAACCAGGCGTTTTCCCCCTGGAAGCTCCCTCGTGCGTCT  
CCTGTTCCGACCCTGCCGCTTACCGGATACCTGTCCGCTTTCTCCCTTCGGGAAGCGTGGCGCTTTCTCATAGC  
TCACGCTGTAGGTATCTCAGTTCGGTGTAGGTGCTTCGCTCCAAGCTGGGCTGTGTGCACGAACCCCCGTTTCAG  
CCCGACCCTGCGCCTTATCCGGTAACTATCGTCTTGAGTCCAACCCGGTAAGACACGACTTATCGCCACTGGCA  
GCAGCCACTGGTAACAGGATTAGCAGAGCGAGGTATGTAGGCGGTGCTACAGAGTTCCTGAAGTGGTGGCCTAAC  
TACGGCTACACTAGAAGGACAGTATTTGGTATCTGCGCTCTGCTGAAGCCAGTTACCTTCGGAAAAAGAGTTGGT  
AGCTCTTGATCCGGCAAACAAACCACCGCTGGTAGCGGTGTTTTTTTTGTTTTGCAAGCAGCAGATTACCGCGAGA  
AAAAAGGATCTCAAGAAGATCCTTTGATCTTTTCTACGGGTCTGACGCTCAGTGGAACGAAAACCTCACGTTAA  
GGGATTTTTGGTCATGAGATTATCAAAAAGGATCTTACCTAGATCCTTTTAAATTA AAAATGAAGTTTTAAATCA  
ATCTAAAGTATATATGAGTAACTTGGTCTGACAGTTACCAATGCTTAATCAGTGAGGCACCTATCTCAGCGATC  
TGTCTATTTTCGTTTCATCCATAGTTGCCTGACTCCCCGTCGTGTAGATAACTACGATACGGGAGCGCTTACCATCT  
GGCCCAGTGCTGCAATGATAACCGGAGACCCACGCTCACCGCTCCAGATTTATCAGCAATAAACCAGCCAGCC  
GGAAGGGCCGAGCGCAGAAGTGGTCTGCAACTTTATCCGCTCCATTTCAGTCTATTAATTGTTGCCGGGAAGCT  
AGAGTAAGTAGTTCCGACGTTAATAGTTTGC GCAACGTTGTTGGCATTGCTACAGGCATCGTGGTGTCACTCTCG  
TCGTTTTGGTATGGCTTCATTCAGCTCCGGTCCCAACGATCAAGGCGAGTTACATGATCCCCCATGTTGTGCAA  
AAAGCGGTTAGCTCCTTCGGTCCCTCCGATCGTTGTGAGAAGTAAGTTGGCCGAGTGTATCACTCATGGTTATG  
GCAGCACTGCATAATTCTCTTACTGTGCATGCCATCCGTAAGATGCTTTTTCTGTGACTGGTGAGTACTCAACCAAG  
TCATTCTGAGAATAGTGTATGCGGCGACCGAGTTGCTCTTGCCCGCGTCAATACGGGATAATAGTGTATCACAT  
AGCAGAACTTTAAAAGTGCTCATCATTGGAAAACGTTCTTCGGGGCGAAAACCTCAAGGATCTTACCCTGTTG  
AGATCCAGTTCGATGTAACCCACTCGTGACCCAACTGATCTTCAGCATCTTTTACTTTACCAGCGTTTTCTGGG  
TGAGCAAAAACAGGAAGGCAAAAATGCCGCAAAAAGGGAAATAAGGGCGACACGGAAATGTTGAATACTCATACT  
TTCCTTTTTCAATGGGTAATAACTGATATAATTA AATTGAAGCTCTAATTTGTGAGTTTAGTATAACATGCATTTA  
CTTATAATAACAGTTTTTTAGTTTTGCTGGCCGATCTTCTCAAATATGCTTCCAGCCTGCTTTTTCTGTAACGTT  
CACCTCTACCTTAGCATCCCTTCCCTTTGCAAATAGTCTCTTCCAACAATAATAATGTCAGATCCTGTAGAGA  
CCACATCATCCACGGTCTATACTGTTGACCCAATGCGTCTCCCTTGTCACTAAACCCACACCGGGTGTATAA  
TCAACCAATCGTAACCTTCATCTCTTCCACCCATGTCTCTTTGAGCAATAAAGCCGATAACAAAATCTTTGTGCG  
TCTTCGCAATGTCAACAGTACCCTTAGTATATTTCTCCAGTAGATAGGGAGCCCTTGCATGACAATTCTGCTAACA  
TCAAAAGGCCCTTAGGTTCCCTTGTACTTCTTCTGCCGCTGCTTCAAACCGCTAACAATACCTGGGCCACCA  
CACCGTGTGCATTCGTAATGTCTGCCCATCTGCTATTCTGTATACACCCGAGAGTACTGCAATTTGACTGTAT



TACCAATGTCAGCAAATTTTCTGTCTTCGAAGAGTAAAAAATTGTACTTGGCGGATAATGCCTTTAGCGGCTTAA  
CTGTGCCCTCCATGGAAAAATCAGTCAAGATATCCACATGTGTTTTTAGTAAACAAATTTTGGGACCTAATGCTT  
CAACTAACTCCAGTAATTCCTTGGTGGTACGAACATCCAATGAAGCACACAAGTTTGTTCGTTTTTCGTGCATGA  
TATTAATAGCTTGGCAGCAACAGGACTAGGATGAGTAGCAGCACGTTCCCTTATATGTAGCTTTTCGACATGATTT  
ATCTTCGTTTTCTGCAGGTTTTTGTCTGTGCAGTTGGGTAAAGAATACTGGGCAATTTTCATGTTTTCTCAACAC  
TACATATGCGTATATATAACCAATCTAAGTCTGTGCTCCTTCCTTCGTTCTTCCTTCTGTTCGGAGATTACCGAAT  
CAAAAAAATTTCAAAGAAACCGAAATCAAAAAAAGAATAAAAAAATGATGAATTGAATTGAAAAGCTAGCT  
TATCGATGATAAGCTGTCAAAGATGAGAATTAATTCACGGACTATAGACTATACTAGATACTCCGTCTACTGTA  
CGATACTTCCGCTCAGGTCCTTGTCTTAAACGAGGCCTTACCCTCTTTTGTACTCTATTGATCCAGCTCA  
GCAAAGGCAGTGTGATCTAAGATTCTATCTTCGCGATGTAGTAAACTAGCTAGACCGAGAAAGAGACTAGAAAT  
GCAAAGGCACCTTCTACAATGGCTGCCATCATTATTATCCGATGTGACGCTGCAGCTTCTCAATGATATTCGAAT  
ACGCTTTGAGGAGATACAGCCTAATATCCGACAACTGTTTTACAGATTTACGATCGTACTTGTACCATCATT  
GAATTTTGAACATCCGAACCTGGGAGTTTTCCCTGAAACAGATAGTATATTTGAACCTGTATAATAATATATAGT  
CTAGCGCTTTACGGAAGACAATGTATGTATTTCCGTTCCCTGGAGAACTATTGCATCTATTGCATAGGTAATCTT  
GCACGTCGCATCCCCGGTTCATTTTCTGCGTTCCATCTTGCACCTCAATAGCATATCTTTGTAAACGAAGCATC  
TGTGCTTCATTTTGTAGAACAAAAATGCAACGCGAGAGCGCTAATTTTTCAAACAAAGAATCTGAGCTGCATTTT  
TACAGAACAGAAATGCAACGCGAAAGCGCTATTTTACCAACGAAGAATCTGTGCTTCATTTTGTAAAACAAAA  
TGCAACGCGACGAGAGCGCTAATTTTTCAAACAAAGAATCTGAGCTGCATTTTACAGAACAGAAATGCAACGCG  
AGAGCGCTATTTTACCAACAAAGAATCTATACTTCTTTTTTGTCTACAAAAATGCATCCCGAGAGCGCTATTTT  
TCTAACAAAGCATCTTAGATTACTTTTTTCTCCTTTGTGCGCTCTATAATGCAGTCTCTTGATAACTTTTTGCA  
CTGTAGGTCCGTTAAGGTTAGAAGAAGGCTACTTTGGTGTCTATTTTCTCTCCATAAAAAAAGCCTGACTCCAC  
TTCCCGCTTTACTGATTACTAGCGAAGCTGCGGGTGCATTTTTTCAAGATAAAGGCATCCCGATTATATTTCTA  
TACCGATGTGGATTGCGCATACTTTGTGAACAGAAAGTGATAGCGTTGATGATTCTTCATTGGTCAGAAAAATTAT  
GAACGGTTTCTTCTATTTTTGTCTCTATATACTACGTATAGGAAATGTTTACATTTTTCGATTGTTTTCGATTAC  
TCTATGAATAGTTCTTACTACAATTTTTTGTCTAAAGAGTAATACTAGAGATAAACATAAAAAATGTAGAGGTC  
GAGTTTAGATGCAAGTTCAAGGAGCGAAAGGTGGATGGGTAGGTTATATAGGATATAGCACAGAGATATATAGC  
AAAGAGATACTTTTGGAGCAATGTTTGTGGAAGCGGTATTCGCAATGGGAAGCTCCACCCCGTTGATAATCAGAA  
AAGCCCCAAAAACAGGAAGATTGTATAAGCAAATATTTAAATTTGTAACGTTAATATTTGTTAAAATTCGCGTT  
AAATTTTTGTTAAATCAGCTCATTTTTTAACGAATAGCCGAAATCGGCAAAATCCCTTATAAATCAAAAAGATA  
GACCGAGATAGGTTGAGTGTGTTCCAGTTTCCAACAAGAGTCCACTATTAAGAACGTGGACTCCAACGTCAA  
AGGGCGAAAAAGGTTCTATCAGGGCGATGGCCACTACGTGAACCATCACCTAATCAAGTTTTTTGGGGTCGAG  
GTGCCGTAAAGCAGTAAATCGGAAGGGTAAACGGATGCCCCATTTAGAGCTTGACGGGGAAAGCCGGCGAACGT  
GGCGAGAAAGGAAGGGAAGAAAGCGAAAGGAGCGGGGGCTAGGGCGGTGGGAAGTGTAGGGGTCACGCTGGCGT  
AACCACCACACCCGCCGCGCTTAATGGGGCGCTACAGGGCGGTGGGGATGATCCACTAGT

## ACA12 Is a Deregulated Isoform of Plasma Membrane Ca<sup>2+</sup>-ATPase of *Arabidopsis thaliana*

### PLANT MOLECULAR BIOLOGY

Margherita Limonta, Shawn Romanowsky, Claudio Olivari, Maria Cristina Bonza, Laura Luoni, Alexa Rosenberg<sup>2</sup>, Jeffrey F. Harper and Maria Ida De Michelis

**Corresponding author:** Maria Ida De Michelis, Dipartimento di Bioscienze, Università degli Studi di Milano (Italy), [mariaida.demichelis@unimi.it](mailto:mariaida.demichelis@unimi.it)

### Online Resource 2

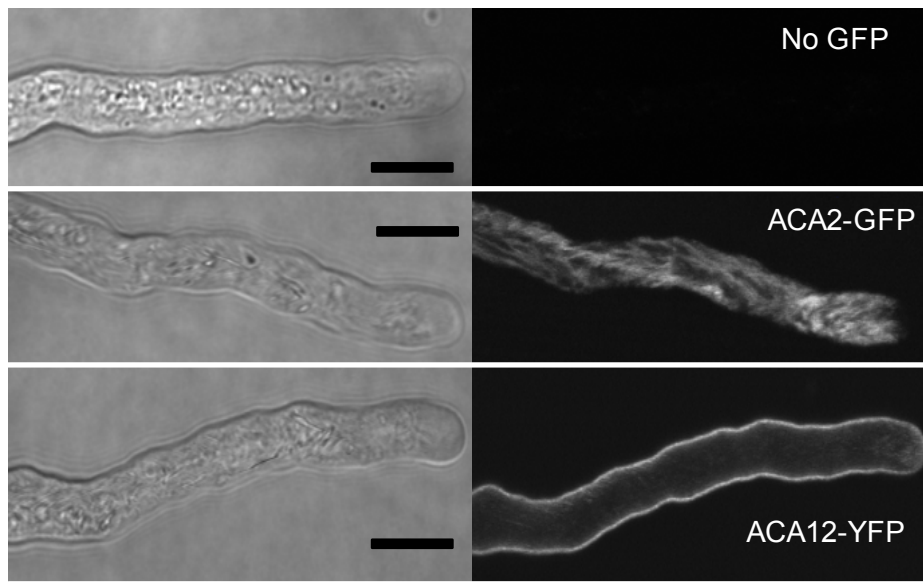

Confocal microscopy showing PM localization for ACA12-YFP. Pollen were germinated *in vitro* and imaged. DIC (Differential Interference Contrast) images are shown to the left, and corresponding confocal fluorescence micrographs to the right. A) A negative control showing a wild type pollen tube without any GFP. B), ACA2-GFP in *aca9-2* *-/-* showing endomembrane localization. Image shown is from transgenic line ss-2106, transformed with *ACA9promoter::ACA2-TAP2(GFP)*. Equivalent results were observed for 3 other independent transgenic lines, ss 2103, 2104, and 2105. C) ACA12-YFP in *aca9-2* *-/-* showing PM (plasma membrane) localization. Image shown is from transgenic line ss-2100, transformed with *ACA9promoter::ACA12-TAP2(YFP)*. Equivalent results were observed for 3 other independent transgenic lines, ss2099, 2101, 2102. Scale bar = 10  $\mu$ m.

Images of XFP fluorescence were collected on a Olympus confocal system (FluoView FV10-ASW 2.1; Olympus) attached to an Olympus microscope (Inverted IX81) using a 60X objective (N.A. = 1.42) and an argon gas laser for generating a 488-nm excitation line. Emission was detected with band pass between 510 and 530 nm. Differential interference contrast (DIC) images were collected on the same system by using a single transmitted light detector. Images were processed by using FluoView software.

## ACA12 Is a Deregulated Isoform of Plasma Membrane Ca<sup>2+</sup>-ATPase of *Arabidopsis thaliana*

PLANT MOLECULAR BIOLOGY

Margherita Limonta, Shawn Romanowsky, Claudio Olivari, Maria Cristina Bonza, Laura Luoni, Alexa Rosenberg, Jeffrey F. Harper and Maria Ida De Michelis

**Corresponding author:** Maria Ida De Michelis, Dipartimento di Bioscienze, Università degli Studi di Milano (Italy), [mariaida.demichelis@unimi.it](mailto:mariaida.demichelis@unimi.it)

### Online Resource 3

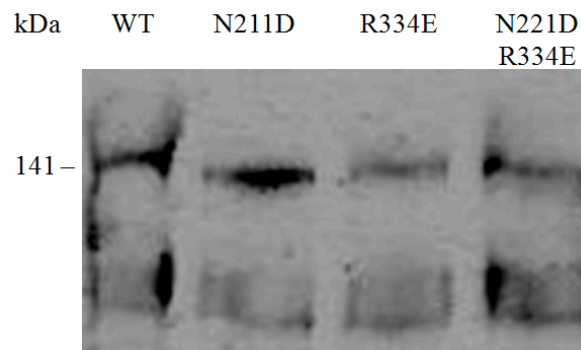

Expression of ACA12-GFP mutants in yeast strain K616. K616 yeast transformed with WT or mutant ACA12-GFP was galactose-induced at 20 °C for 24 h; solubilized microsomal proteins (40 µg) were subjected to SDS-PAGE, blotted and decorated with the HisProbe-HPR.
